# Supplementary material for: Catalytic asymmetric 1,3-dipolar cycloaddition of N-unprotected 2-oxoindolin-3-ylidene derivatives and azomethine ylides for the construction of spirooxindole-pyrrolidines
Source: Royal Society of Chemistry journal article supplement (doi:10.1039/c0ob00943a), 2010-12-08
Supplement: c0ob00943a.pdf [file c0ob00943a.pdf]

**Ag(I)/TF-BiphamPhos catalyzed Asymmetric 1,3-Dipolar  
Cycloaddition of *N*-Unprotected 2-Oxoindolin-3-ylidene Derivatives  
and Azomethine Ylides for the Construction of  
Spirooxindole-Pyrrolidines**

Tang-Lin Liu, Zhi-Yong Xue, Hai-Yan Tao, and Chun-Jiang Wang\*

*College of Chemistry and Molecular Sciences, Wuhan University, 430072, China*

E-mail: [cjwang@whu.edu.cn](mailto:cjwang@whu.edu.cn)

**Supporting Information**

Table of Contents

|     |                                                    |       |
|-----|----------------------------------------------------|-------|
| I.  | <sup>1</sup> H NMR and <sup>13</sup> C NMR Spectra | 1-16  |
| II. | HPLC Chromatograms                                 | 17-46 |

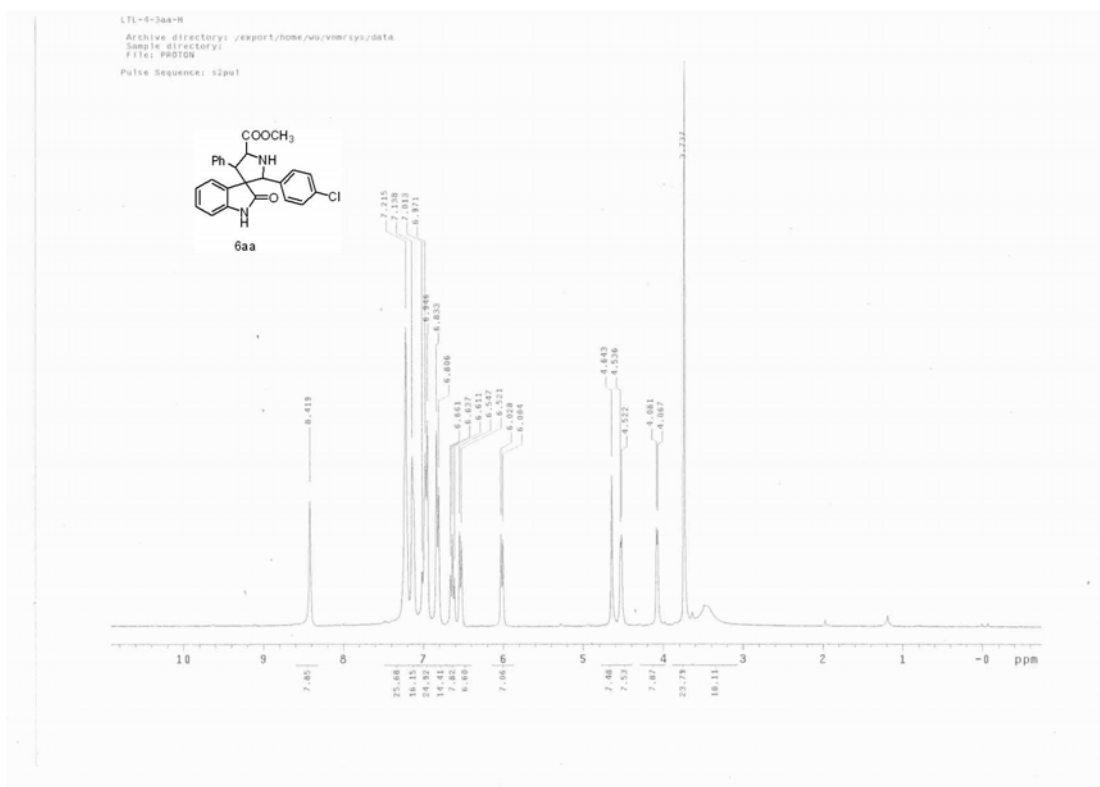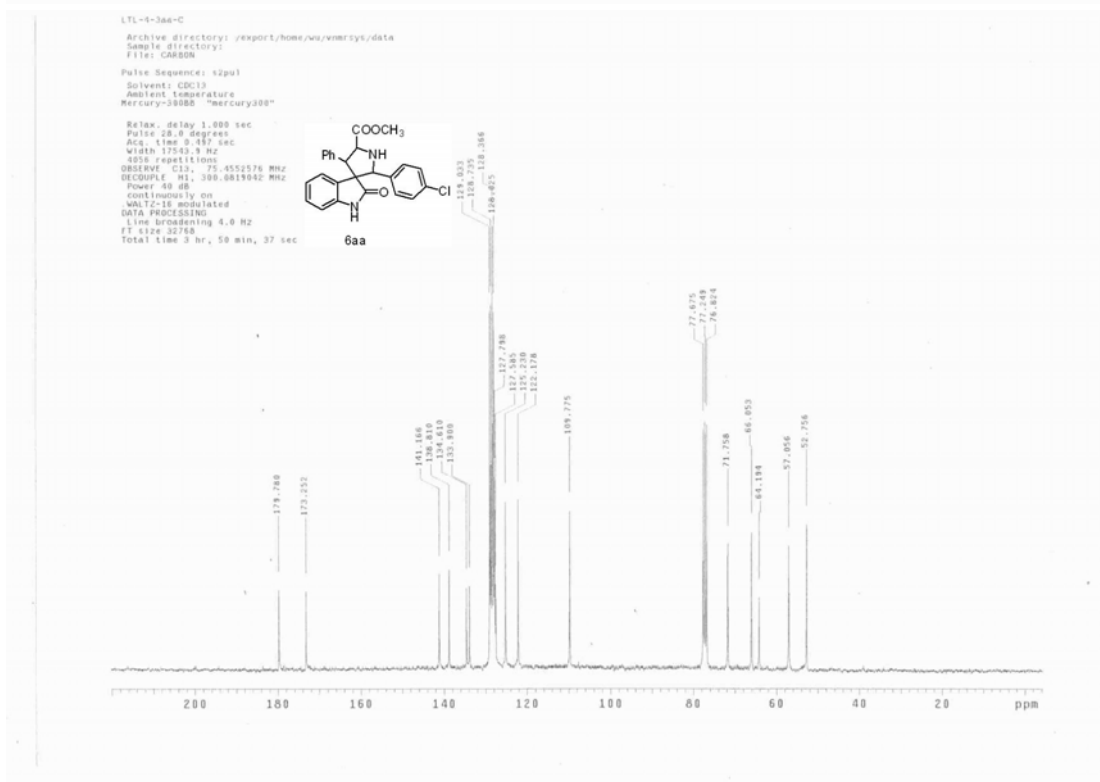

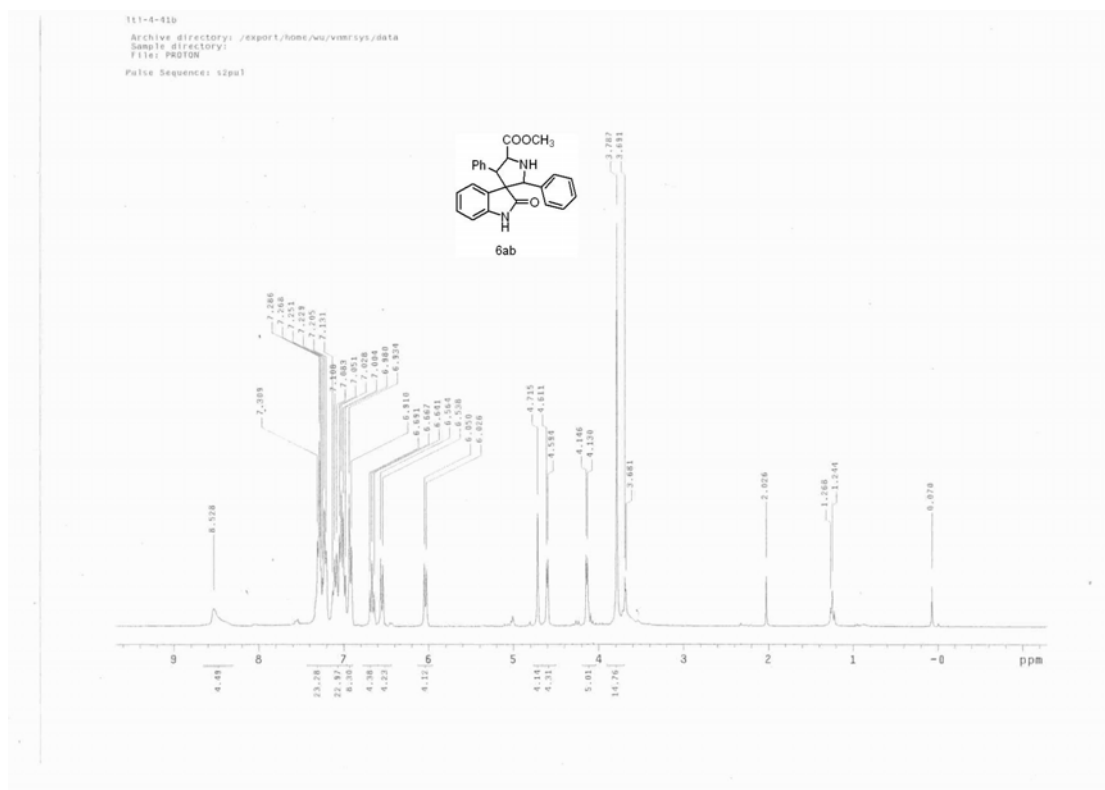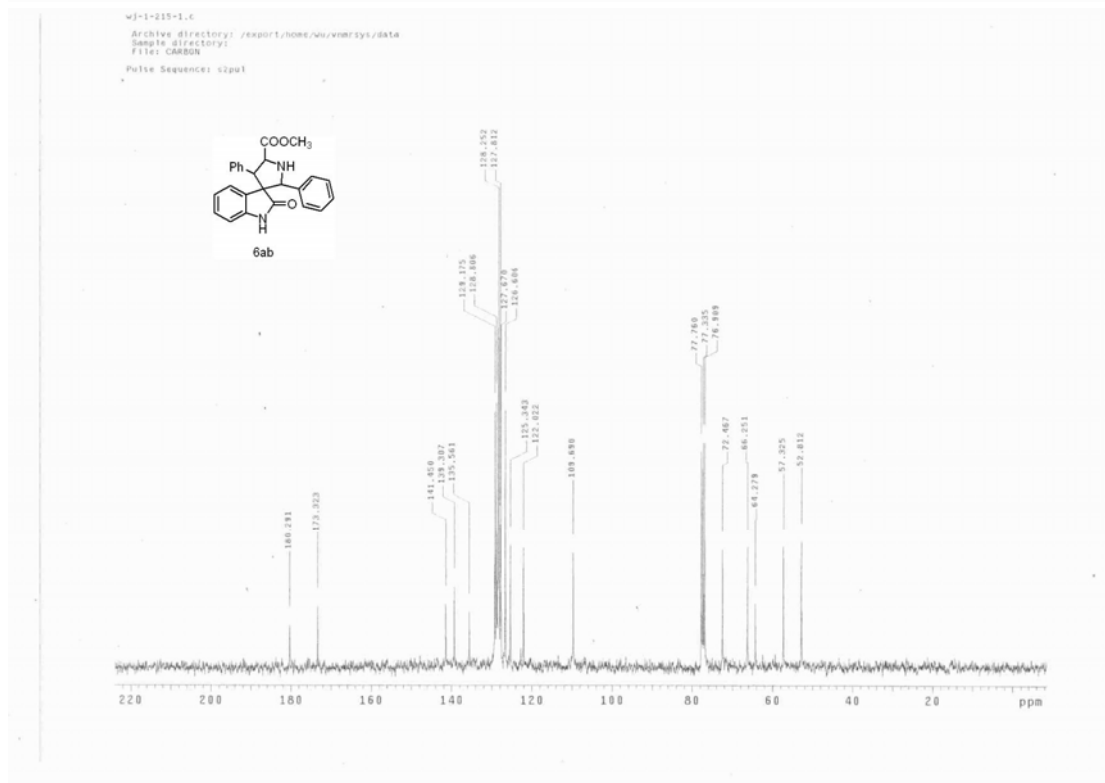

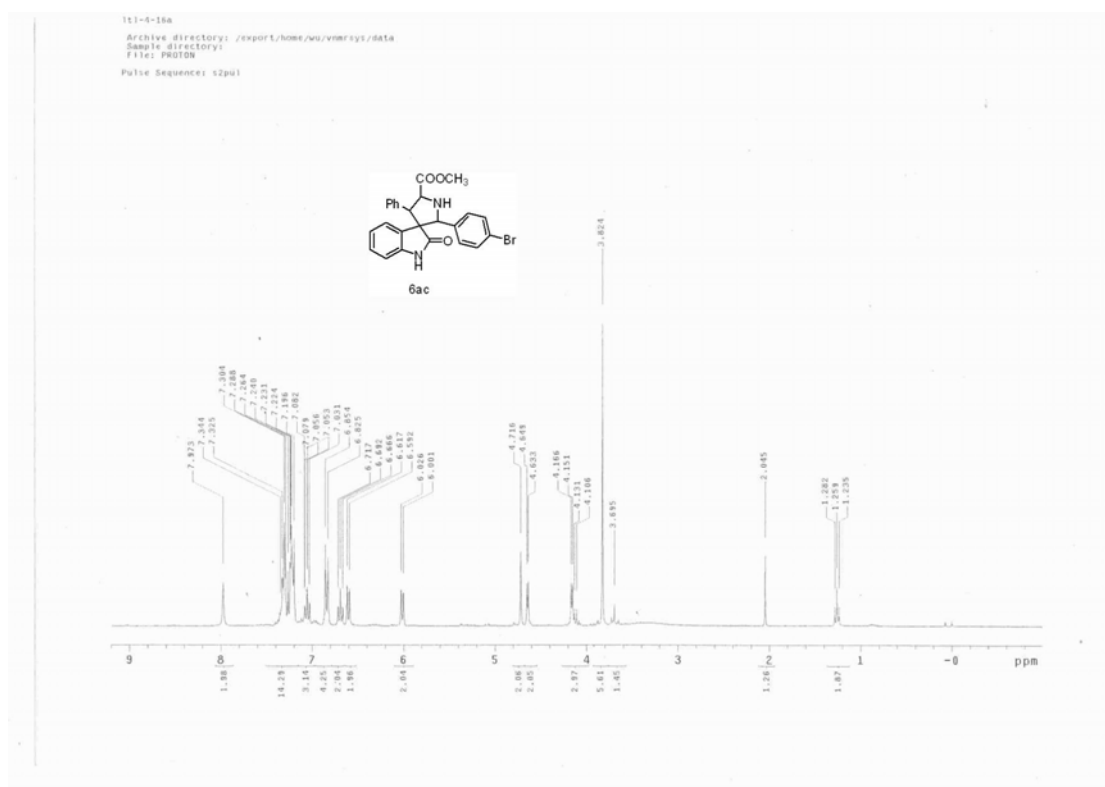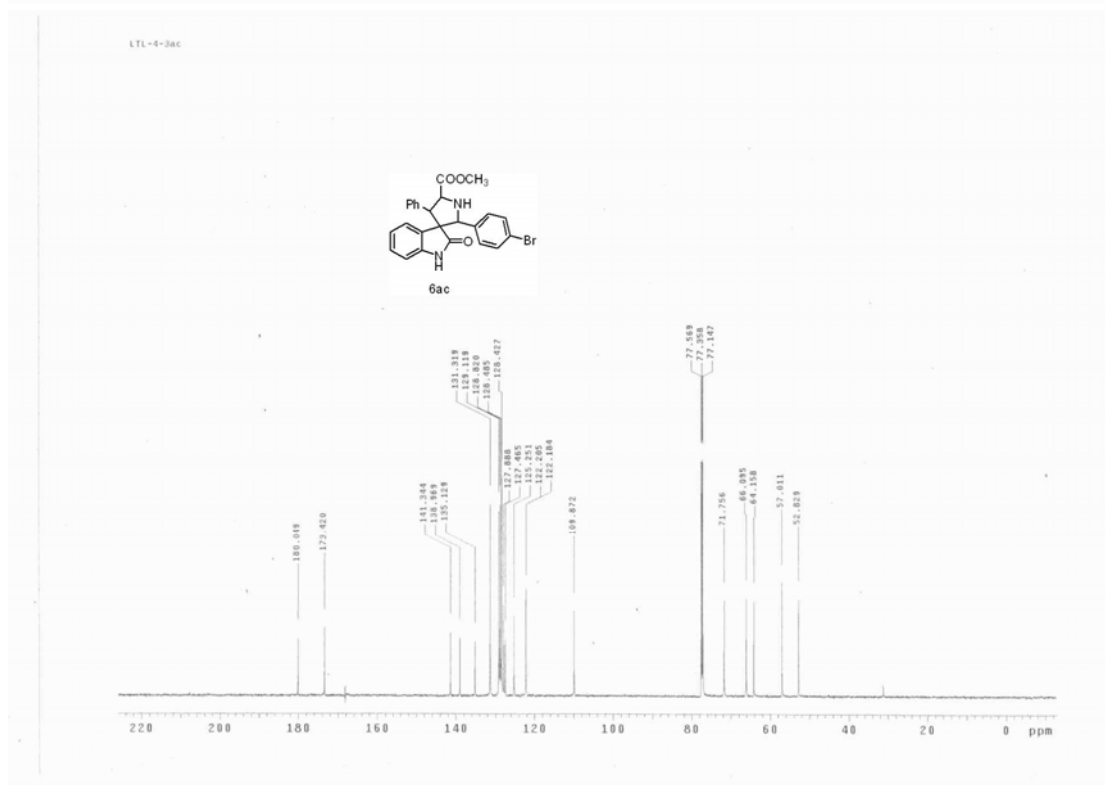

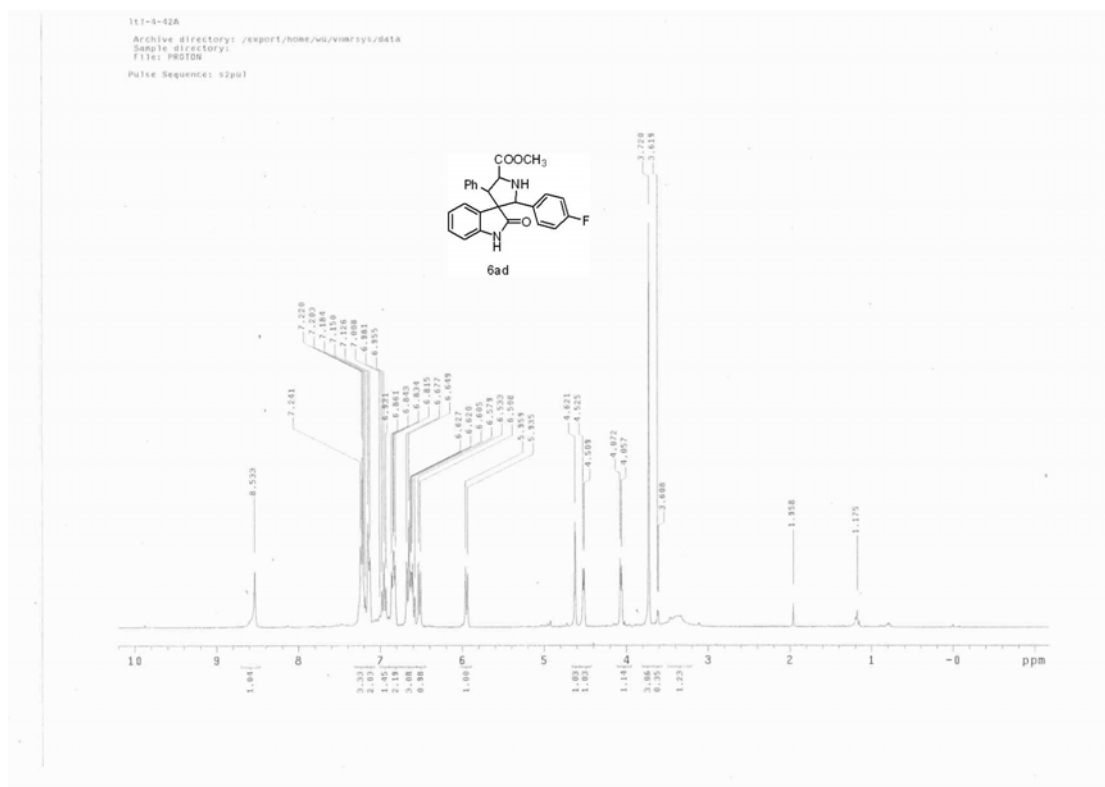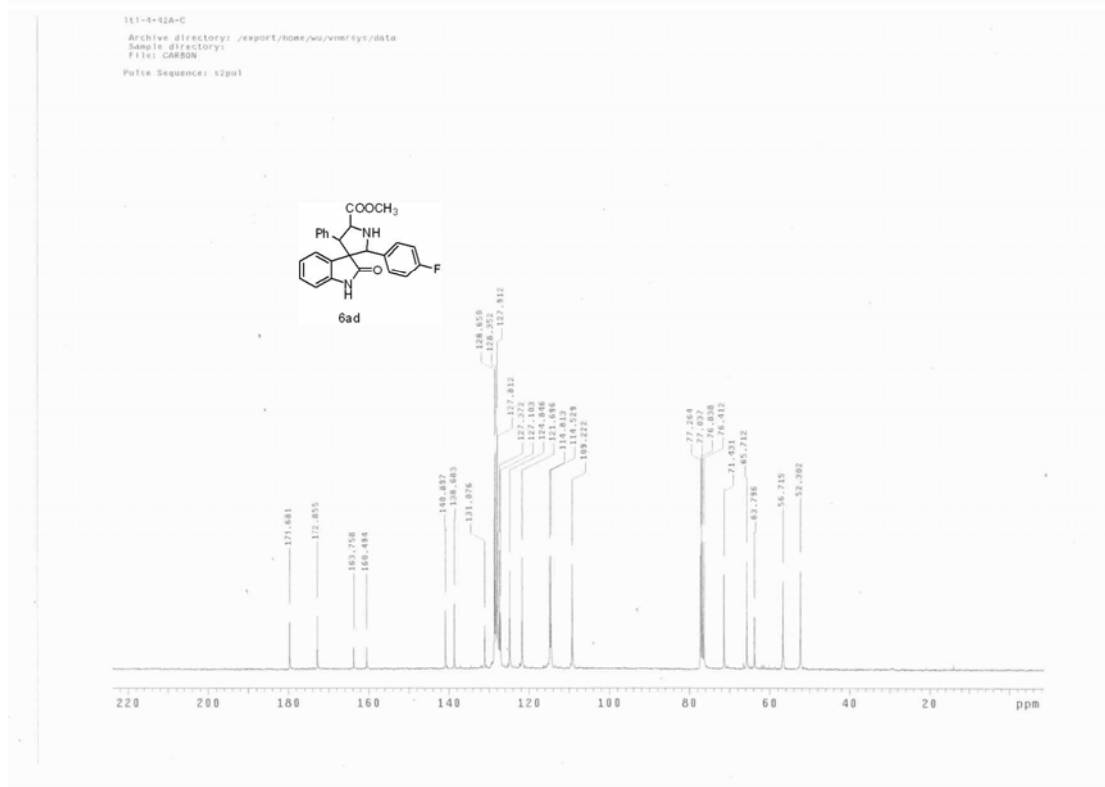

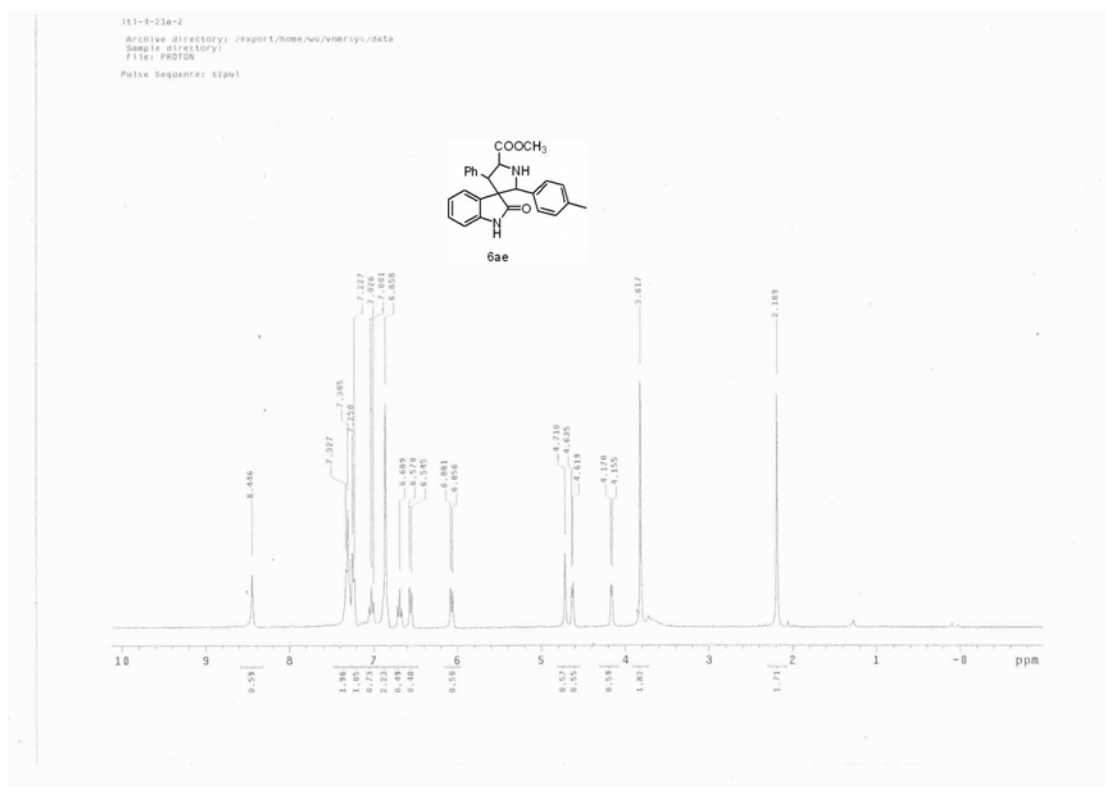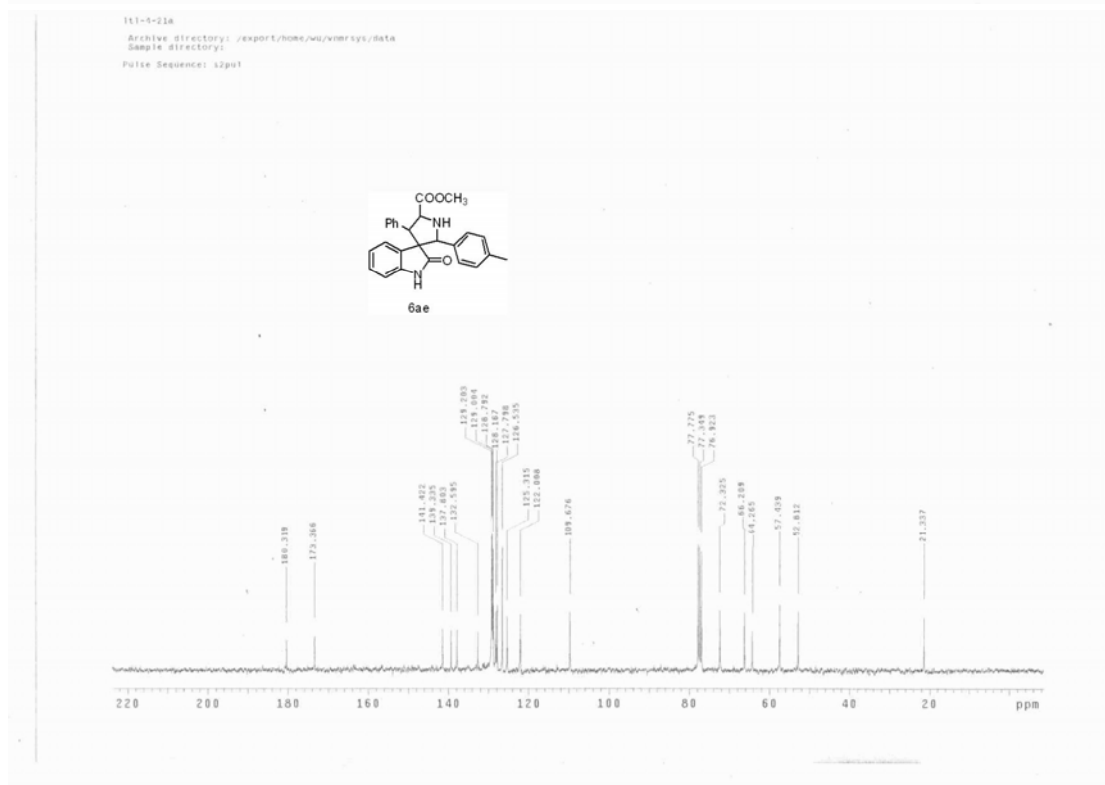

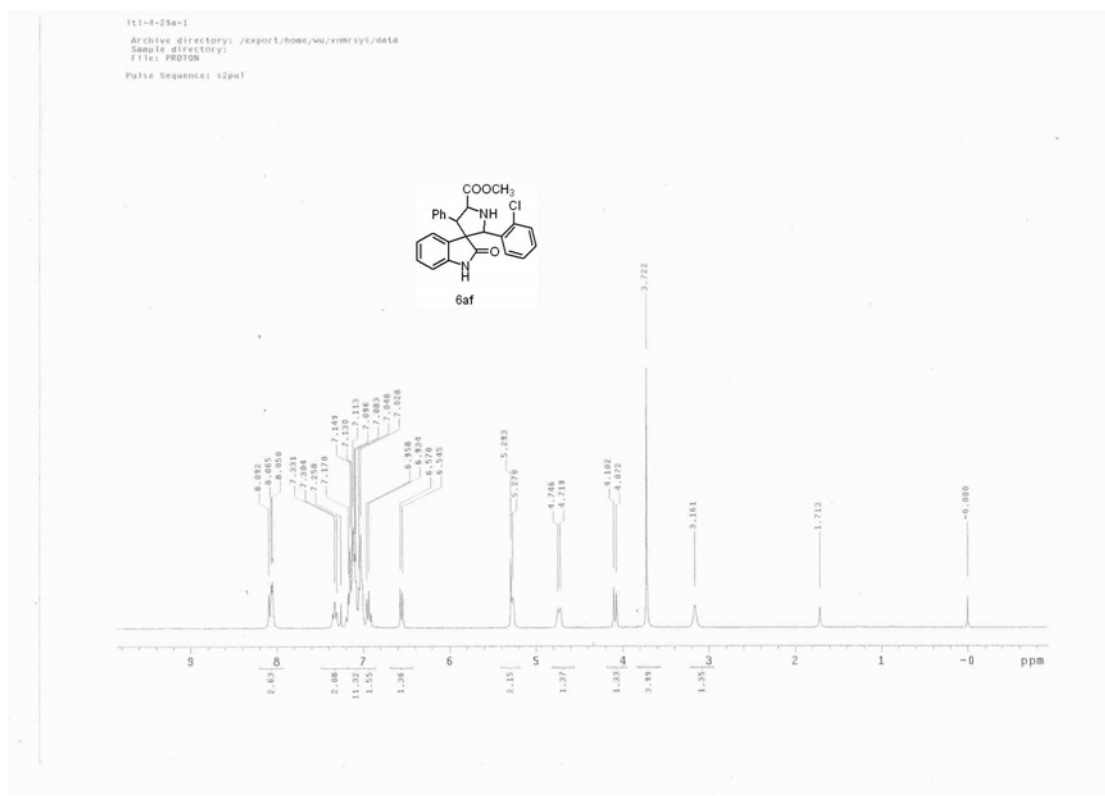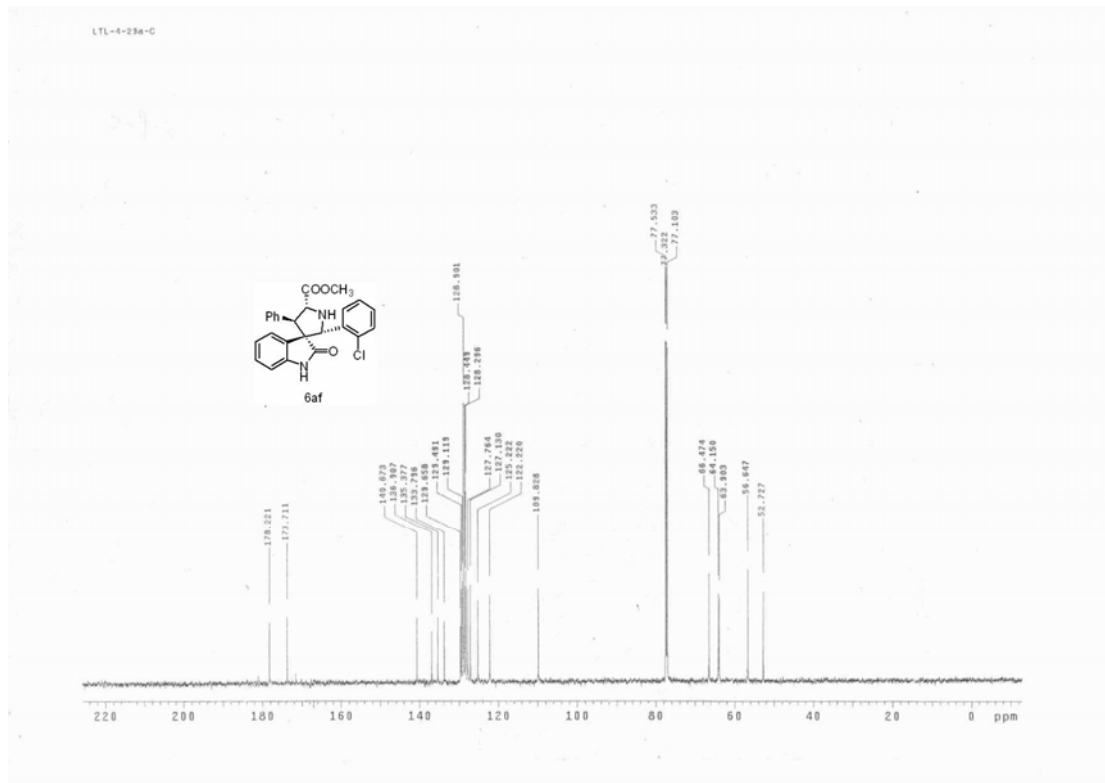

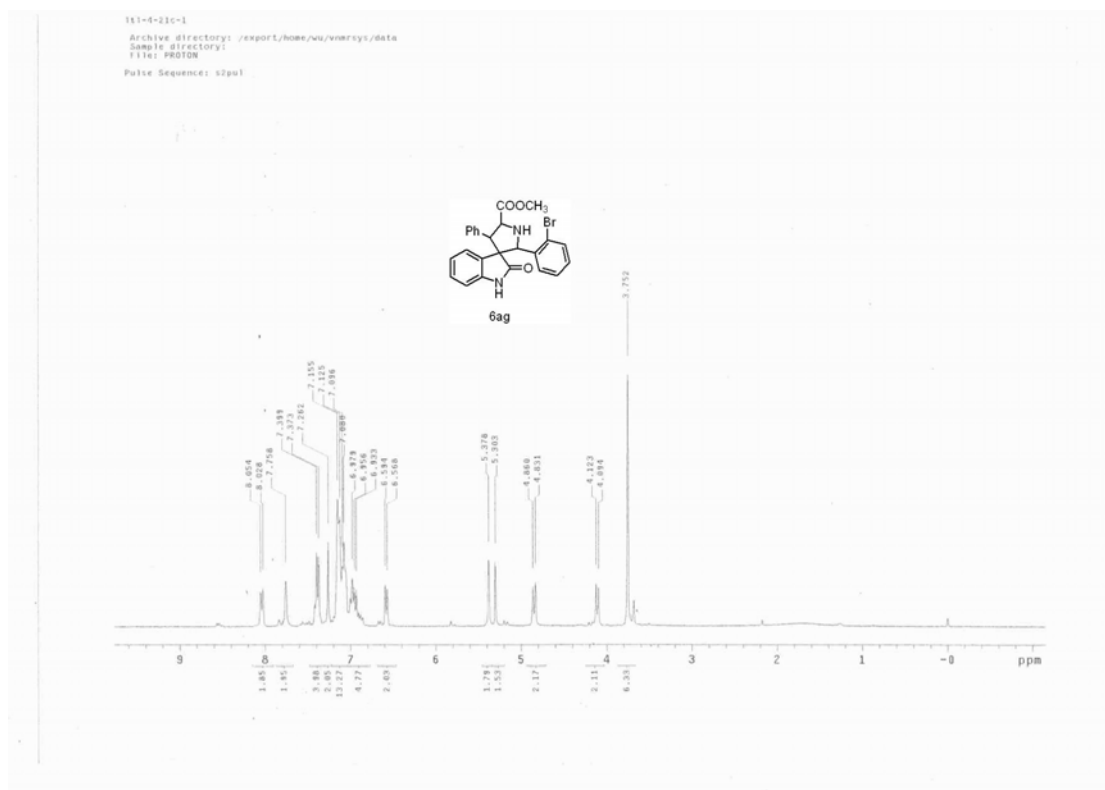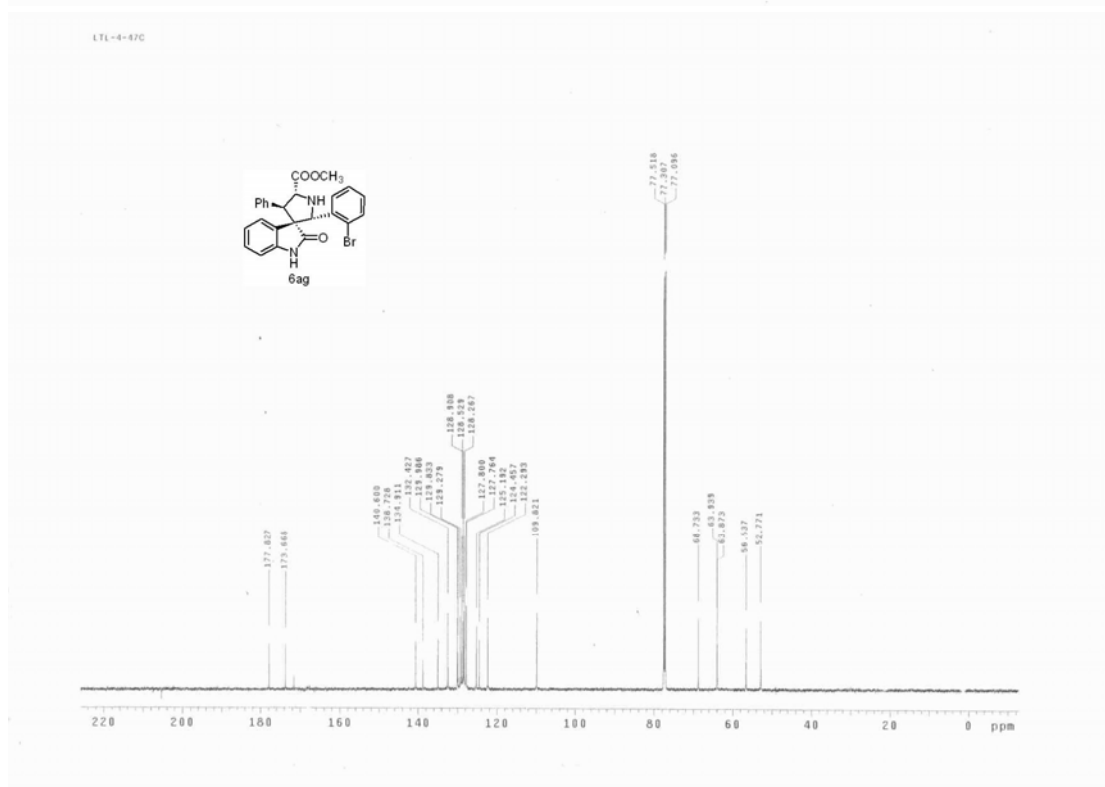



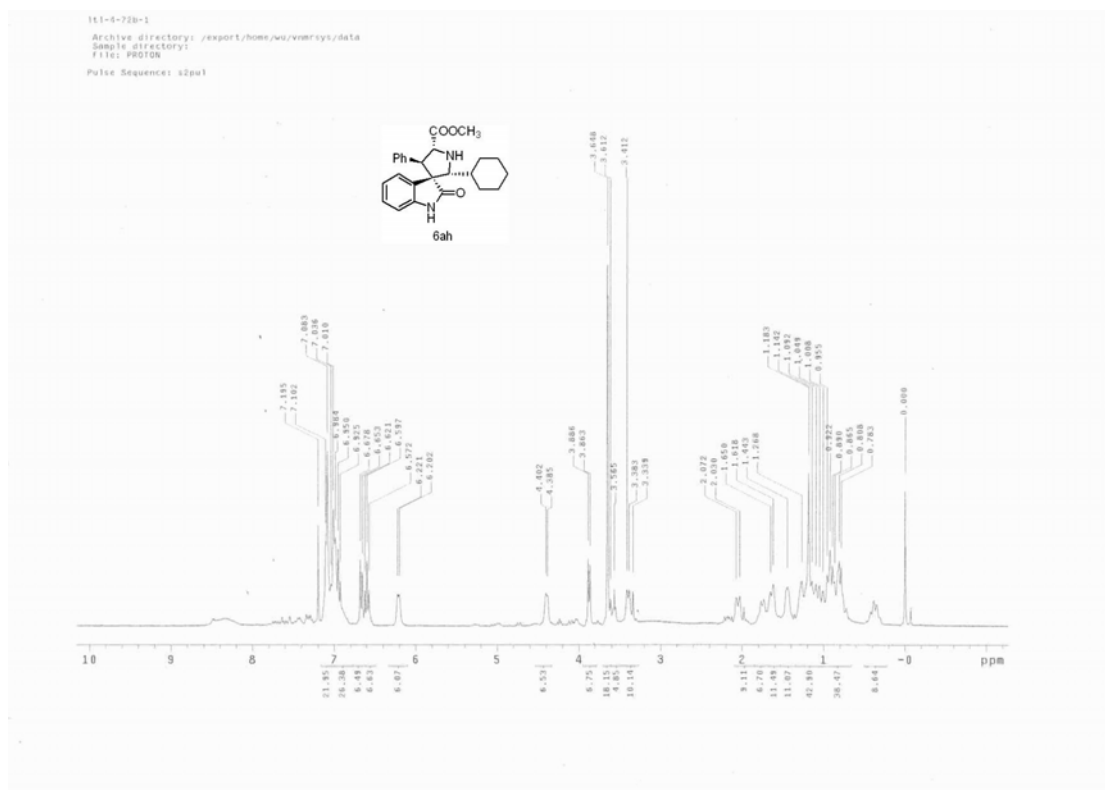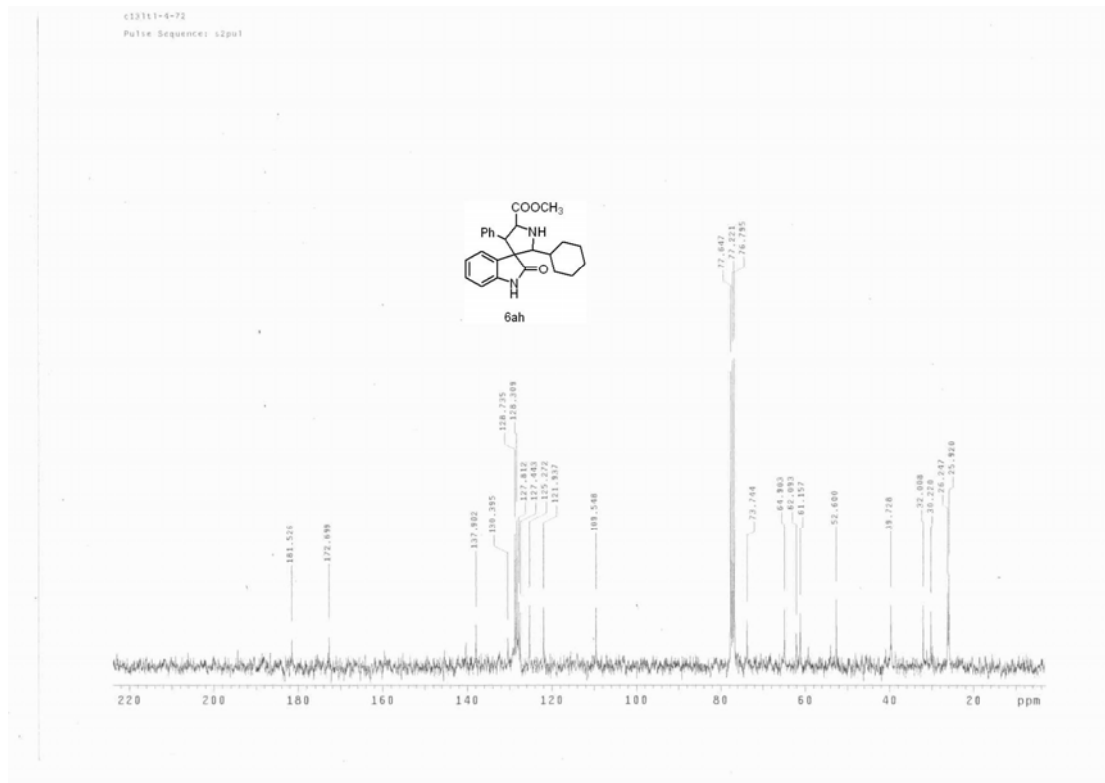

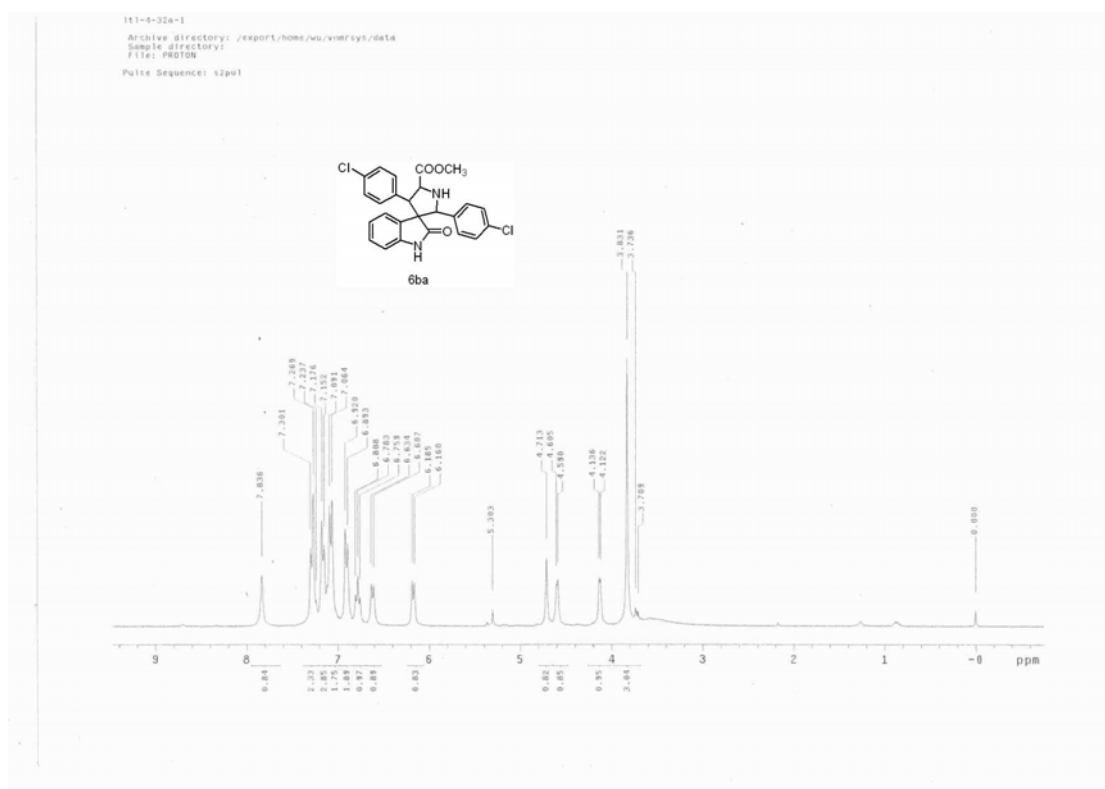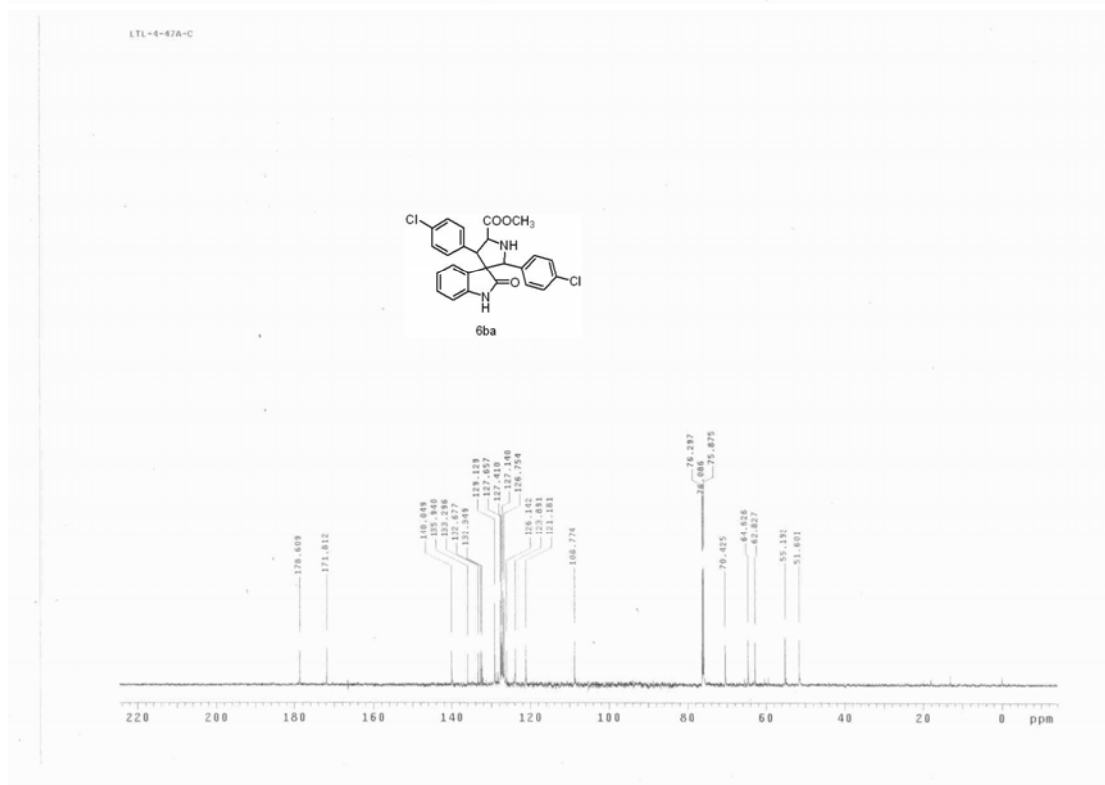

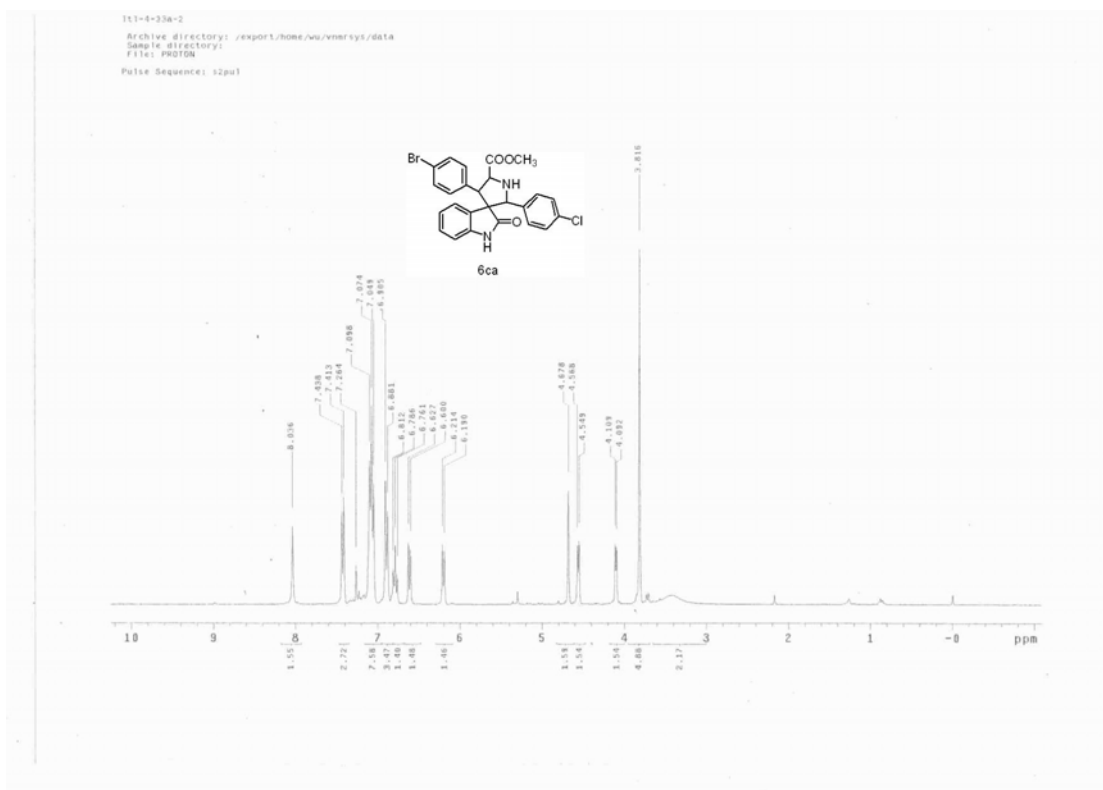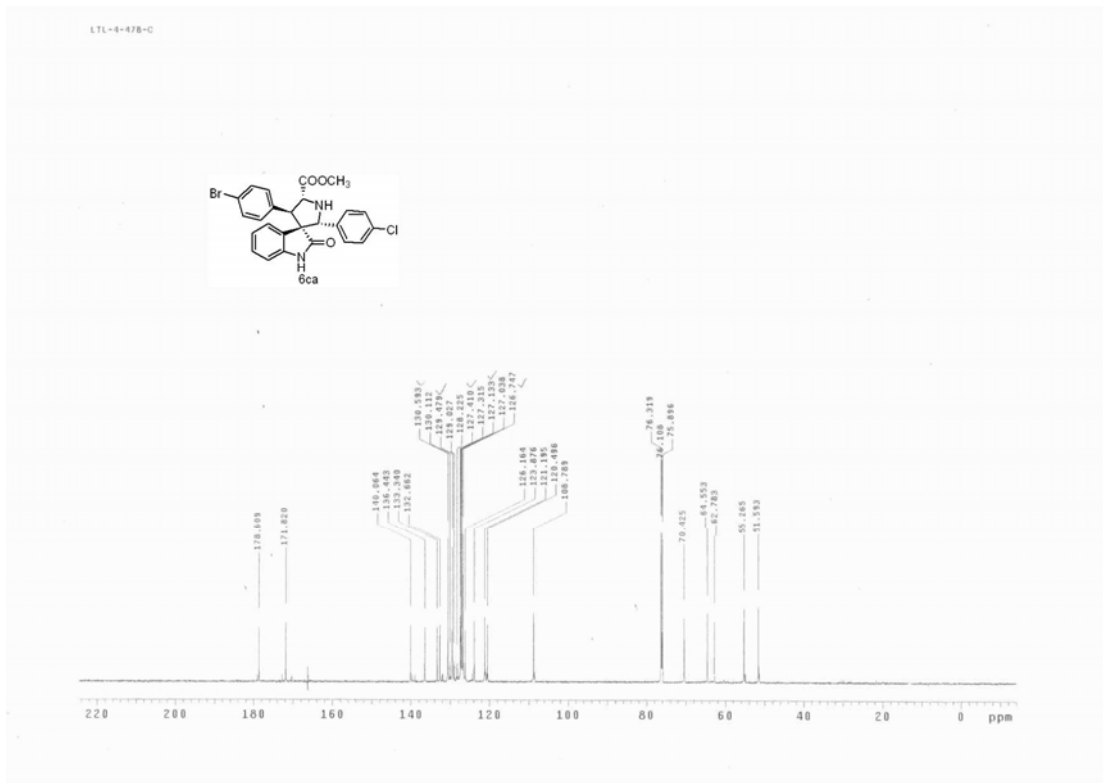

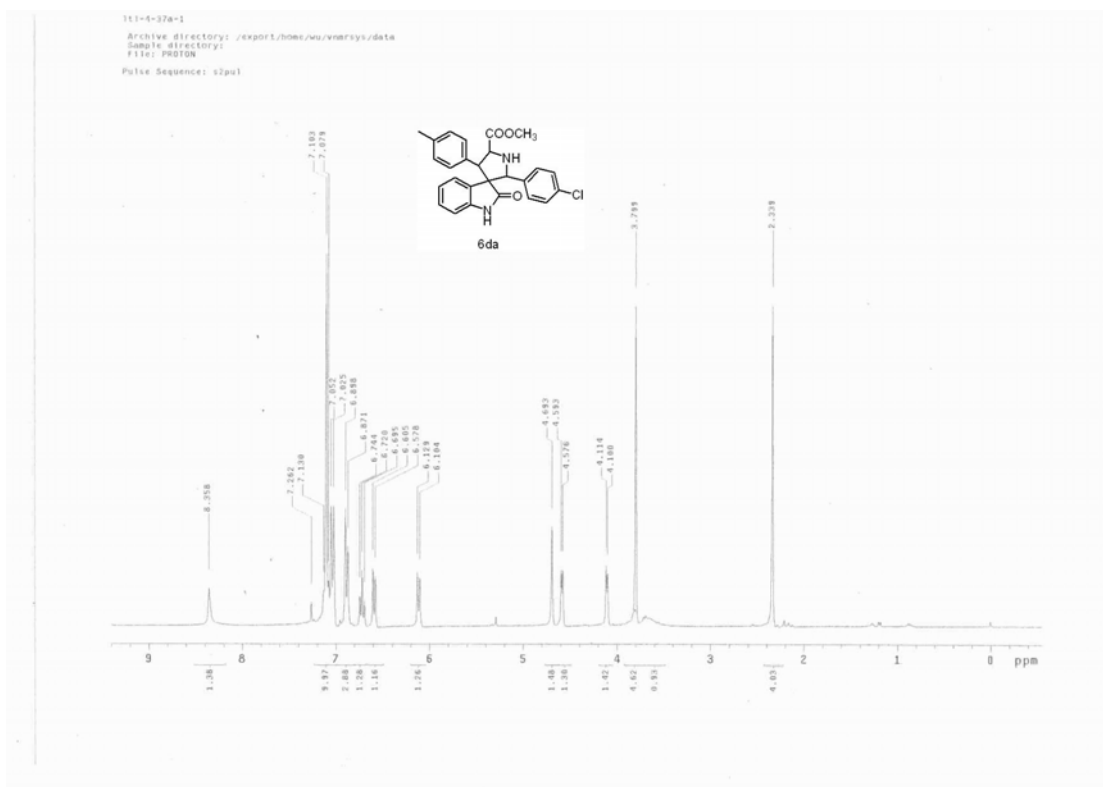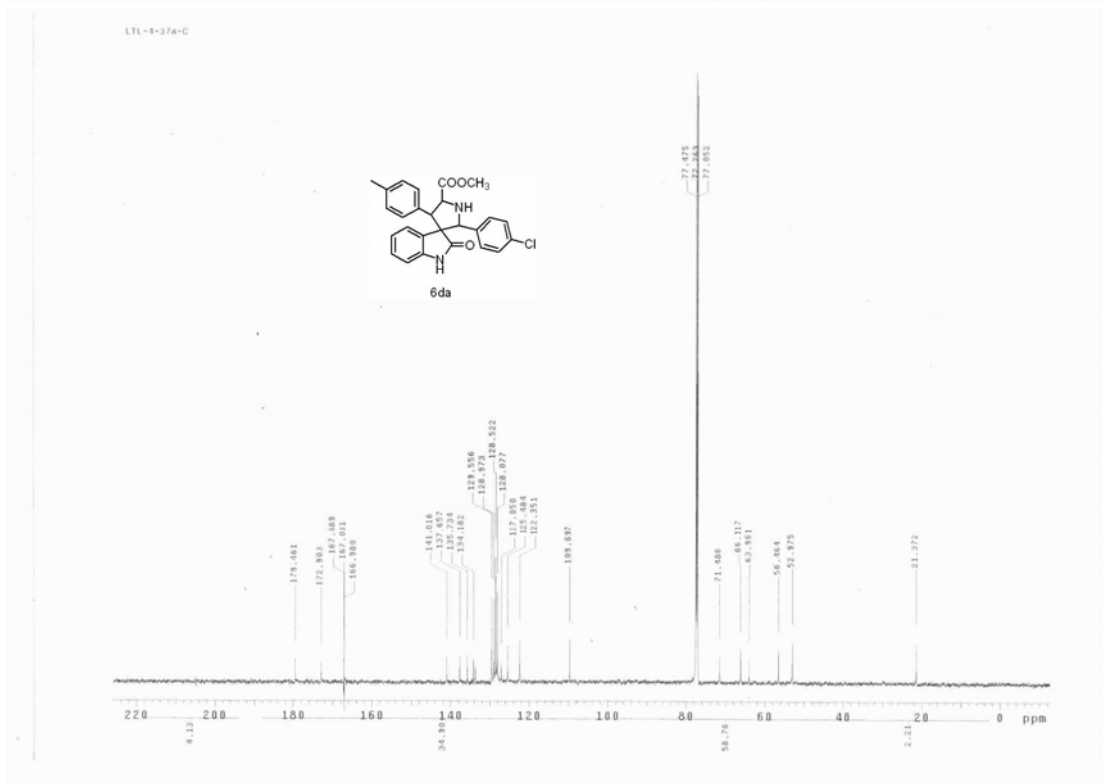

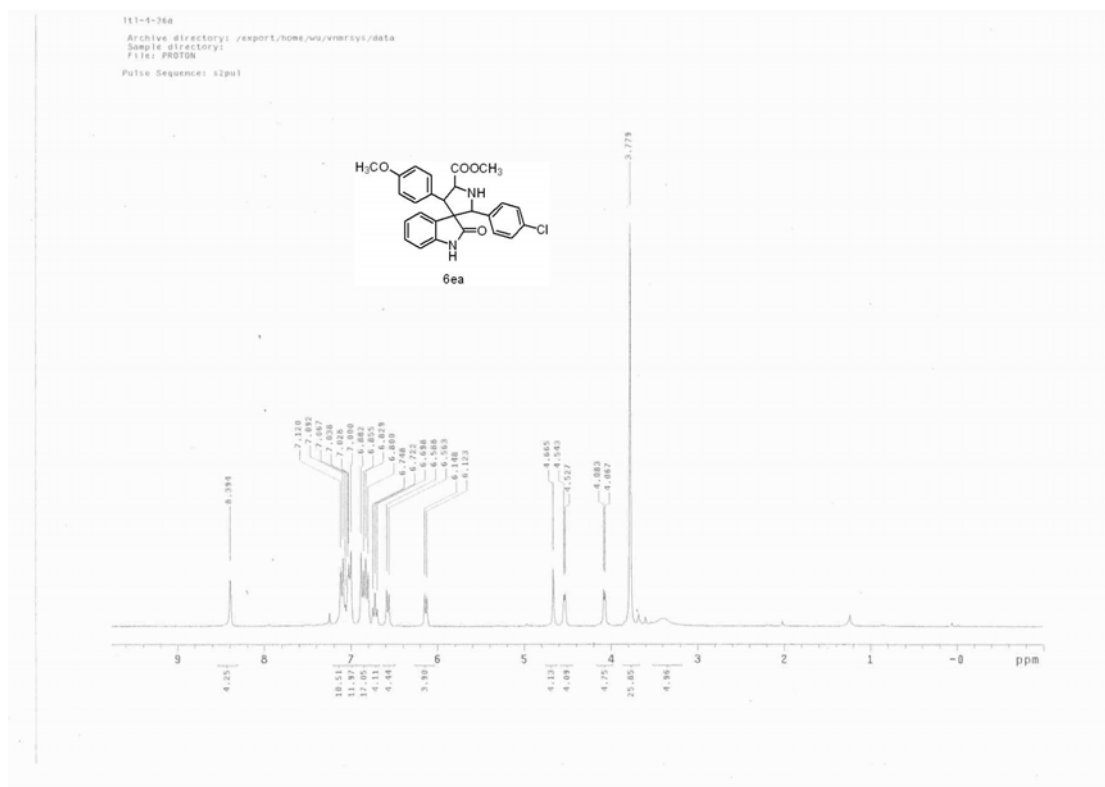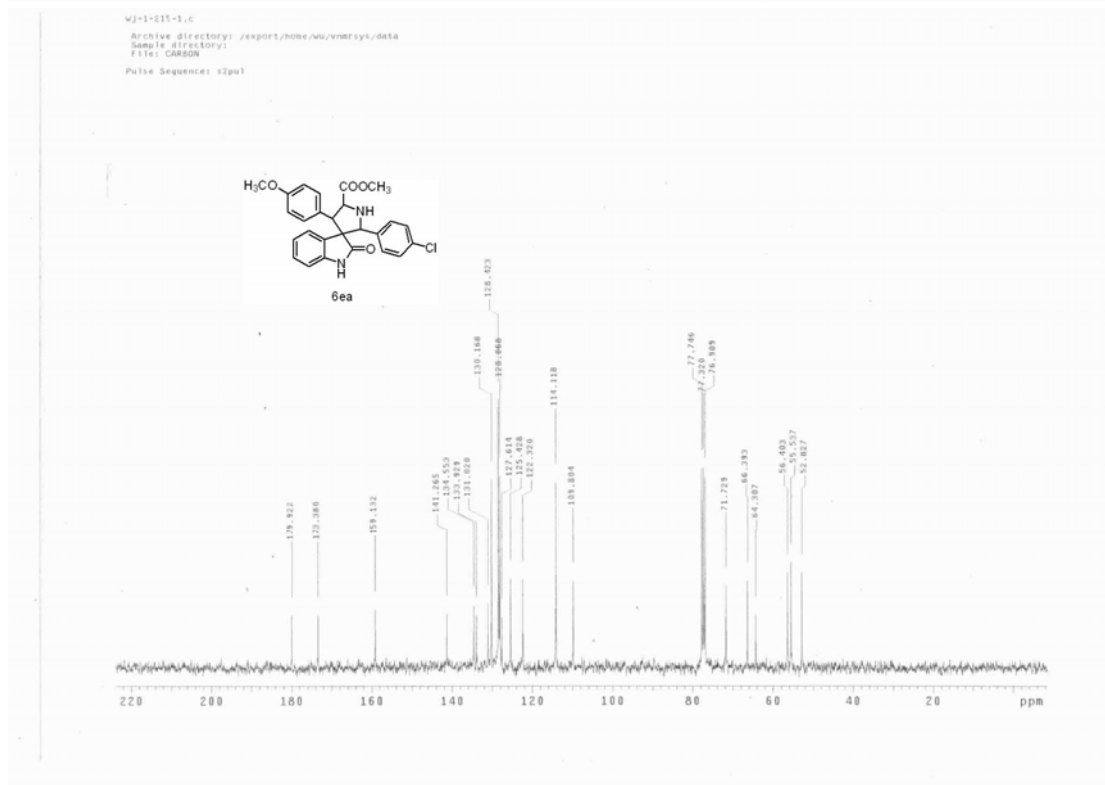

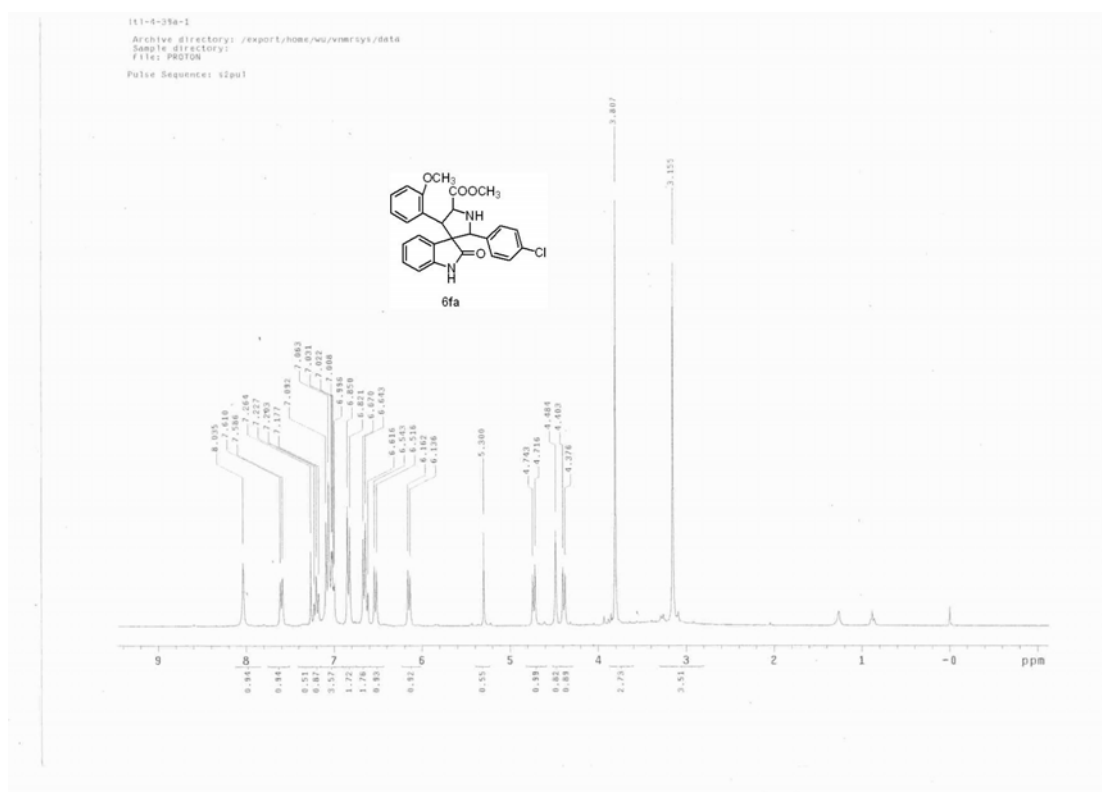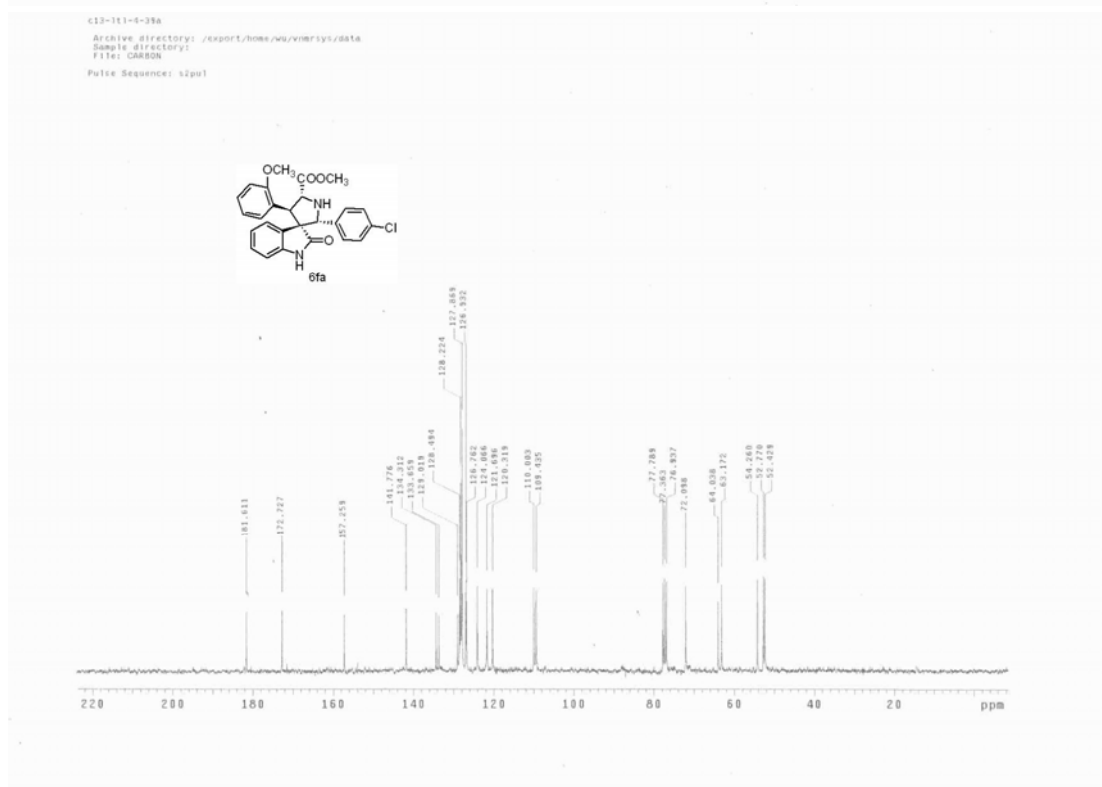

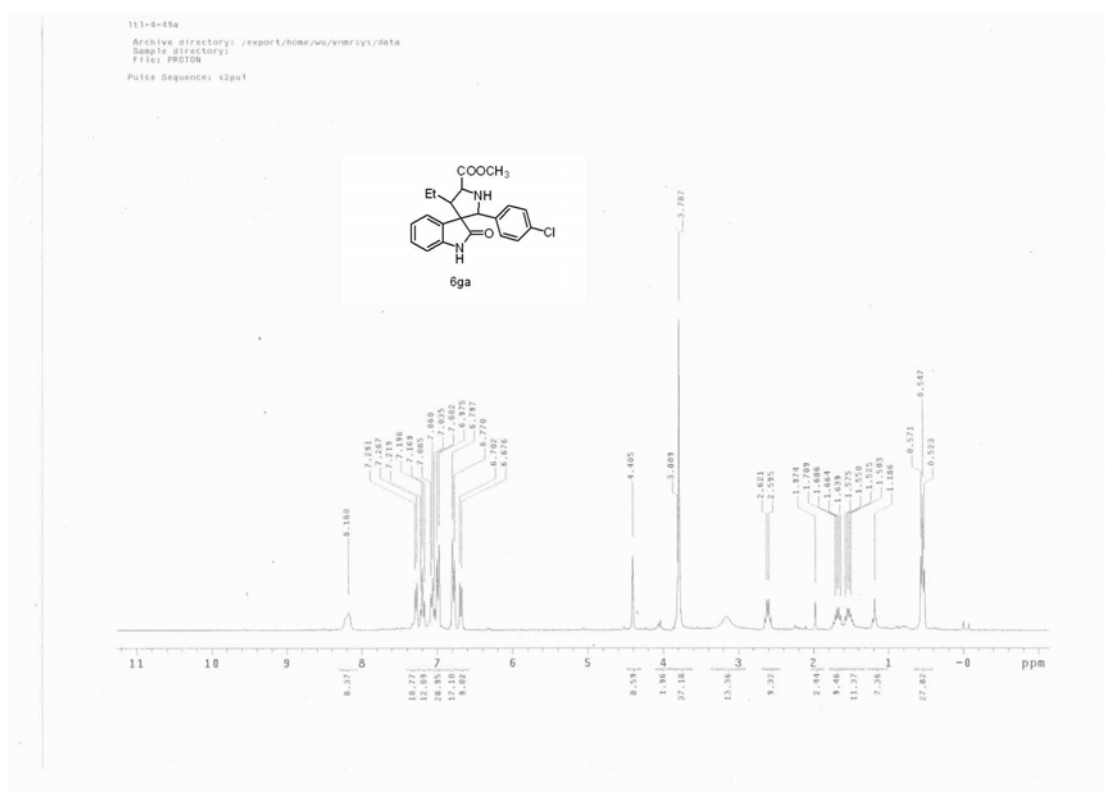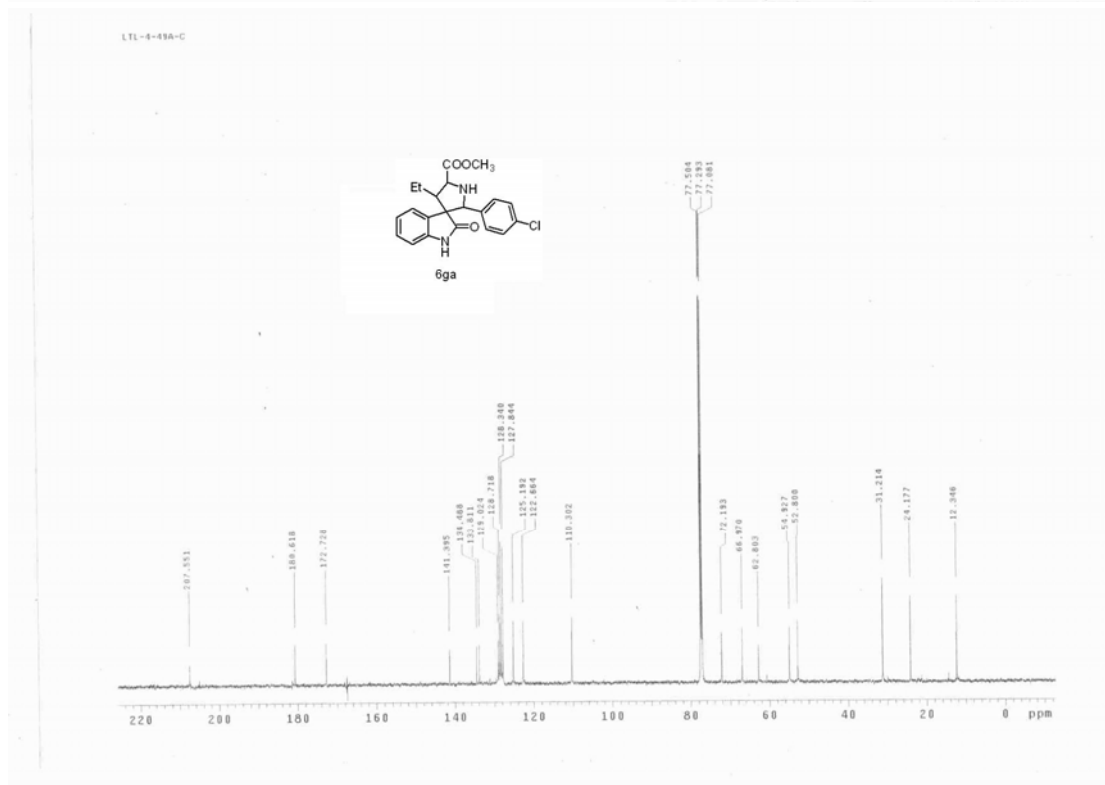

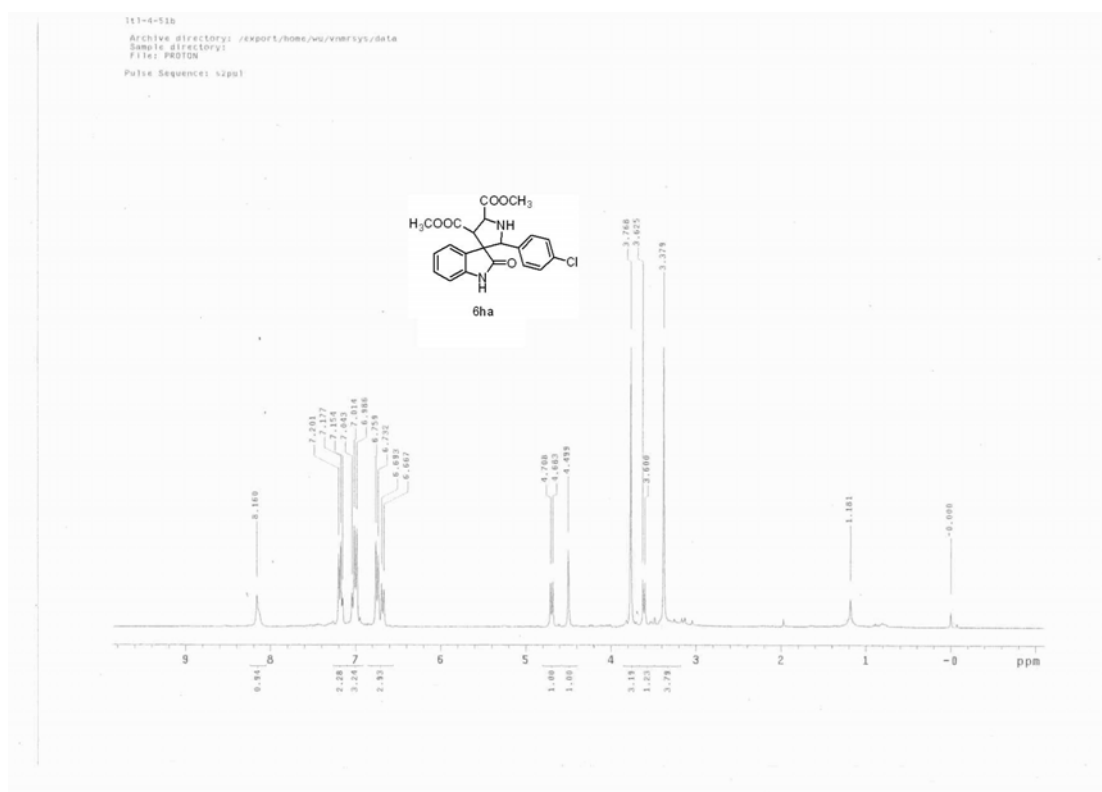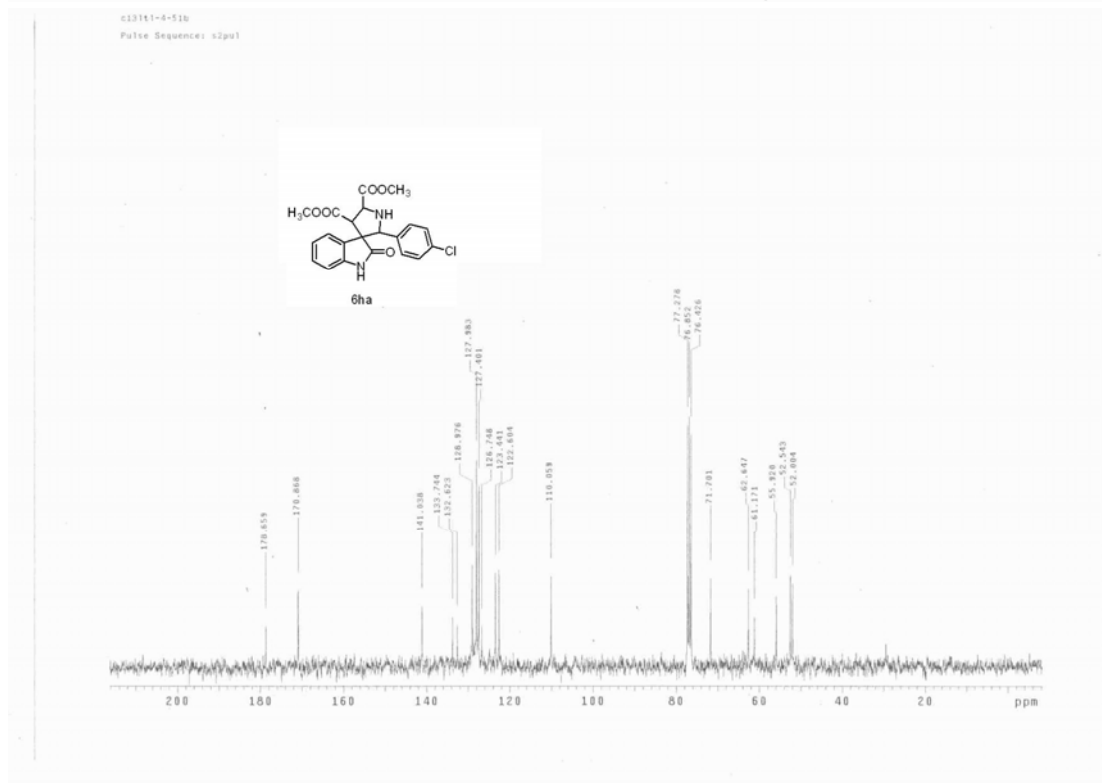



Data File D:\LC\LTL\DATA\LTL-3-34-35 -1\LTL-34-35 -1 2009-10-29 16-11-33\SIG1000002.D  
 Sample Name: LTL-3-34

```

=====
Acq. Operator   : LTL                               Seq. Line :    2
Acq. Instrument : Instrument 1                       Location  : Vial 44
Injection Date  : 10/29/2009 4:23:56 PM             Inj       :    1
                                                    Inj Volume: 5 µl
Acq. Method     : D:\LC\LTL\data\LTL-3-34-35 -1\LTL-34-35 -1 2009-10-29 16-11-33\ASH-30-70-
10ML-254NM-20MIN.M
Last changed    : 9/14/2009 7:03:23 PM by LTL
Analysis Method : D:\LC\LTL\DATA\LTL-3-34-35 -1\LTL-34-35 -1 2009-10-29 16-11-33\SIG1000002.D
D\DA.M (ASH-30-70-10ML-254NM-20MIN.M)
Last changed    : 3/4/2010 9:12:59 AM by dxq
(modified after loading)
    
```

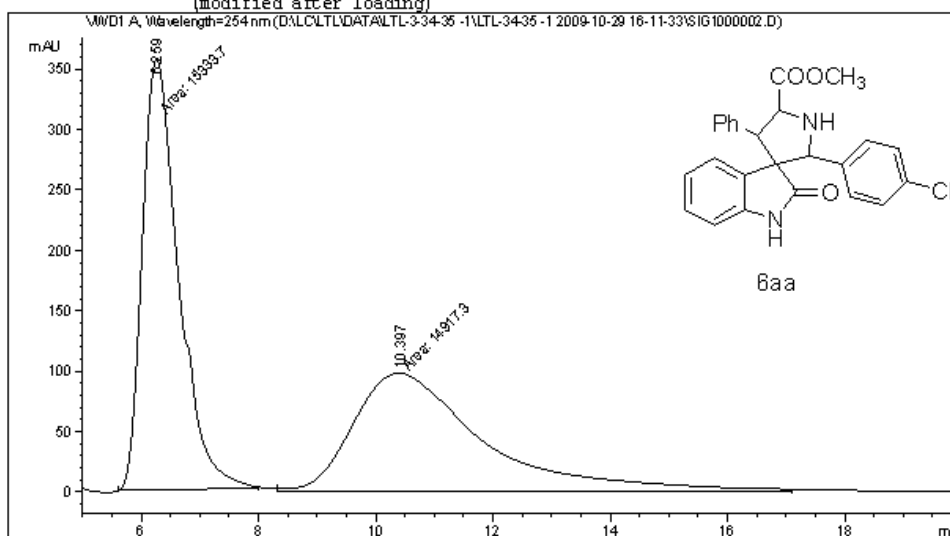

Area Percent Report

```

Sorted By      :      Signal
Multiplier     :      1.0000
Dilution       :      1.0000
Use Multiplier & Dilution Factor with ISTDs
    
```

Signal 1: WMD1 A, Wavelength=254 nm

| Peak # | RetTime [min] | Type | Width [min] | Area mAU *s | Height [mAU] | Area %  |
|--------|---------------|------|-------------|-------------|--------------|---------|
| 1      | 6.259         | MM   | 0.7169      | 1.53337e4   | 356.48831    | 50.6882 |
| 2      | 10.397        | MM   | 2.5392      | 1.49173e4   | 97.91241     | 49.3118 |

Totals :                    3.02510e4    454.40073

Data File D:\LC\LTL\DATA\LTL-3-68\LTL-3-68 2009-12-12 15-14-13\SIG1000002.D  
 Sample Name: LTL-3-68

```

=====
Acq. Operator   : LTL                               Seq. Line :    2
Acq. Instrument : Instrument 1                       Location  : Vial 62
Injection Date  : 12/12/2009 3:26:37 PM            Inj       :    1
                                                    Inj Volume: 5 µl
Acq. Method     : D:\LC\LTL\data\LTL-3-68\LTL-3-68 2009-12-12 15-14-13\ASH-30-70-10ML-254NM-
20MIN.M
Last changed    : 9/14/2009 7:03:23 PM by LTL
Analysis Method : D:\LC\LTL\DATA\LTL-3-68\LTL-3-68 2009-12-12 15-14-13\SIG1000002.D\DA.M (
ASH-30-70-10ML-254NM-20MIN.M)
Last changed    : 3/8/2010 7:35:16 PM by zzh
(modified after loading)
    
```

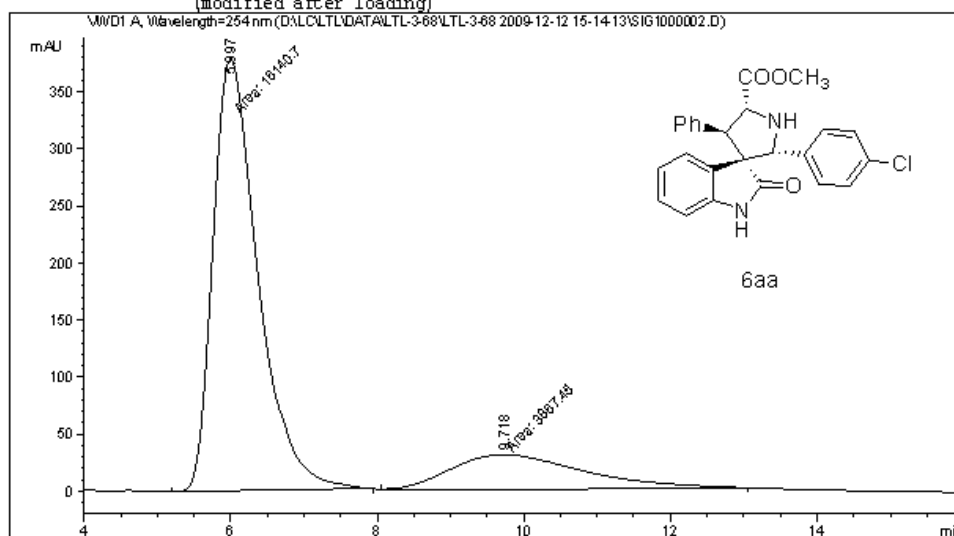

Area Percent Report

```

Sorted By      :      Signal
Multiplier     :      1.0000
Dilution       :      1.0000
Use Multiplier & Dilution Factor with ISTDs
    
```

Signal 1: VMD1 A, Wavelength=254 nm

| Peak # | RetTime [min] | Type | Width [min] | Area mAU   | Height [mAU] | Area %  |
|--------|---------------|------|-------------|------------|--------------|---------|
| 1      | 5.997         | MM   | 0.7109      | 1.61407e4  | 378.41553    | 80.6707 |
| 2      | 9.718         | MM   | 2.1250      | 3867.44727 | 30.33322     | 19.3293 |

Totals :                    2.00082e4   408.74874

Data File D:\LC\LTL\DATA\LTL-4-90\LTL-4-90-100304 2010-03-04 10-37-21\SIG1000006.D  
 Sample Name: LTL-4-41B

```

=====
Acq. Operator   : LTL                               Seq. Line :    6
Acq. Instrument : Instrument 1                       Location  : Vial 75
Injection Date  : 3/4/2010 12:33:17 PM              Inj       :    1
                                                    Inj Volume: 5 µl
Acq. Method     : D:\LC\LTL\data\LTL-4-90\LTL-4-90-100304 2010-03-04 10-37-21\ADH-20-80-
10ML-254NM-25MIN.M
Last changed    : 1/11/2010 8:51:22 PM by LTL
Analysis Method : D:\LC\LTL\DATA\LTL-4-90\LTL-4-90-100304 2010-03-04 10-37-21\SIG1000006.D\
D.M (ADH-20-80-10ML-254NM-25MIN.M)
Last changed    : 3/4/2010 2:43:53 PM by LTL
(modified after loading)
    
```

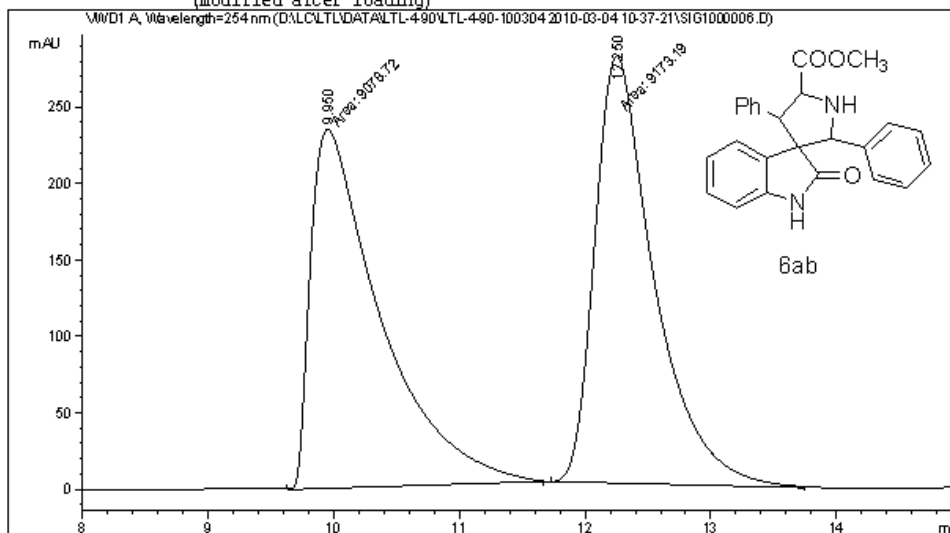

Area Percent Report

```

Sorted By      : Signal
Multiplier     : 1.0000
Dilution       : 1.0000
Use Multiplier & Dilution Factor with ISTDs
    
```

Signal 1: WVD1 A, Wavelength=254 nm

| Peak # | RetTime [min] | Type | Width [min] | Area mAU *s | Height [mAU] | Area %  |
|--------|---------------|------|-------------|-------------|--------------|---------|
| 1      | 9.950         | MM   | 0.6437      | 9078.72461  | 235.05524    | 49.7412 |
| 2      | 12.250        | MM   | 0.5471      | 9173.19043  | 279.42413    | 50.2588 |

Totals : 1.82519e4 514.47937

Data File D:\LC\LTL\DATA\LTL-4-90\LTL-4-90-100304 2010-03-04 10-37-21\SIG1000007.D  
 Sample Name: LTL-4-41C

```

=====
Acq. Operator   : LTL                               Seq. Line :    7
Acq. Instrument : Instrument 1                       Location  : Vial 76
Injection Date  : 3/4/2010 12:59:15 PM              Inj       :    1
                                                    Inj Volume: 5 µl
Acq. Method    : D:\LC\LTL\data\LTL-4-90\LTL-4-90-100304 2010-03-04 10-37-21\ADH-20-80-
                10ML-254NM-25MIN.M
Last changed   : 1/11/2010 8:51:22 PM by LTL
Analysis Method : D:\LC\LTL\DATA\LTL-4-90\LTL-4-90-100304 2010-03-04 10-37-21\SIG1000007.D\
                DA.M (ADH-20-80-10ML-254NM-25MIN.M)
Last changed   : 3/4/2010 2:45:00 PM by LTL
                (modified after loading)
    
```

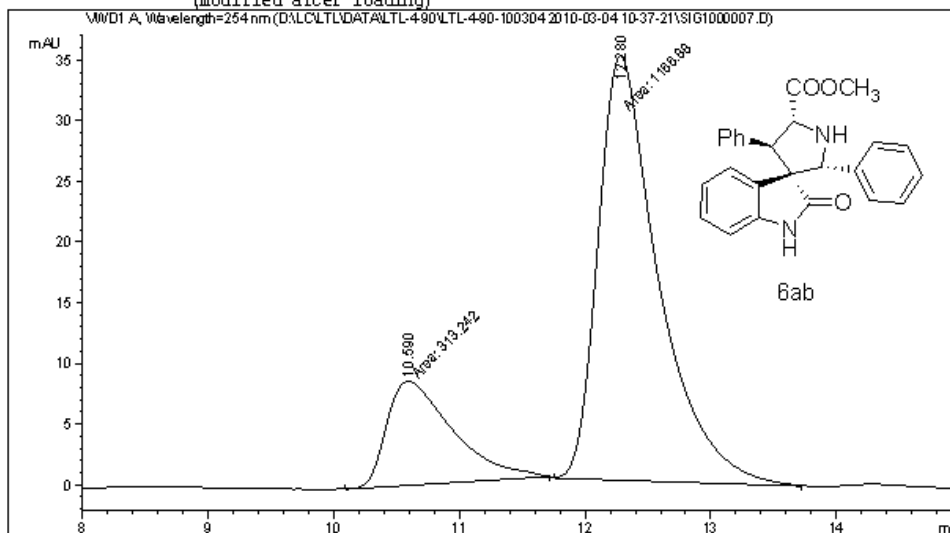

Area Percent Report

```

=====
Sorted By      :      Signal
Multiplier     :      1.0000
Dilution       :      1.0000
Use Multiplier & Dilution Factor with ISTDs
    
```

Signal 1: WVD1 A, Wavelength=254 nm

| Peak # | RetTime [min] | Type | Width [min] | Area mAU   | Height [mAU] | Area %  |
|--------|---------------|------|-------------|------------|--------------|---------|
| 1      | 10.590        | MM   | 0.6089      | 313.24179  | 8.57329      | 21.1633 |
| 2      | 12.280        | MM   | 0.5561      | 1166.87500 | 34.97038     | 78.8367 |

Totals :                      1480.11679    43.54366

Data File D:\LC\LTL\DATA\LTL-4-21\LTL-4-21-AD-100112 2010-01-12 08-40-28\SIG1000002.D  
 Sample Name: LTL-4-7E-1

```

=====
Acq. Operator   : LTL                               Seq. Line :    2
Acq. Instrument : Instrument 1                       Location  : Vial 43
Injection Date  : 1/12/2010 8:52:21 AM              Inj       :    1
                                                    Inj Volume: 5 µl
Acq. Method    : D:\LC\LTL\data\LTL-4-21\LTL-4-21-AD-100112 2010-01-12 08-40-28\ADH-20-80-
10ML-254NM-25MIN.M
Last changed   : 1/11/2010 8:51:22 PM by LTL
Analysis Method : D:\LC\LTL\DATA\LTL-4-21\LTL-4-21-AD-100112 2010-01-12 08-40-28\SIG1000002.D
D\DA.M (ADH-20-80-10ML-254NM-25MIN.M)
Last changed   : 3/4/2010 9:28:38 AM by dxq
                (modified after loading)
    
```

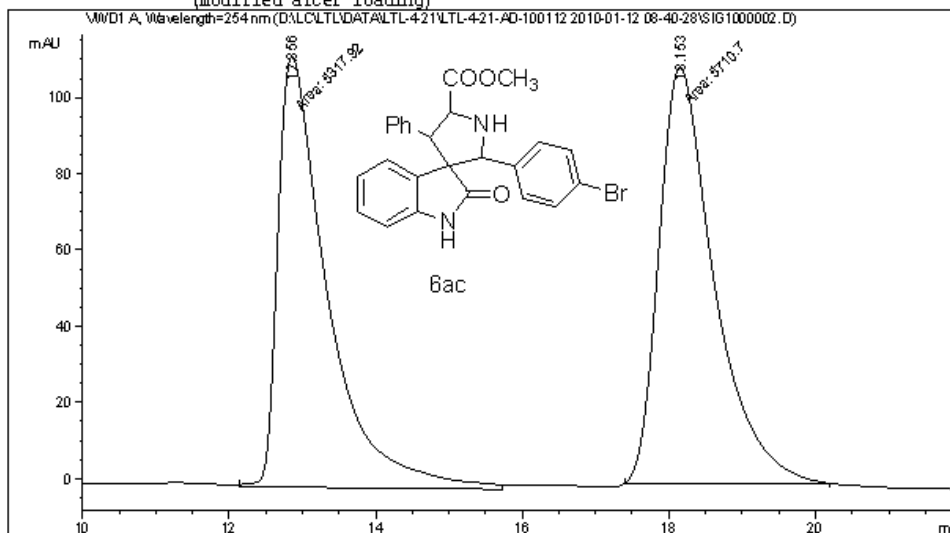

Area Percent Report

```

Sorted By      : Signal
Multiplier     : 1.0000
Dilution       : 1.0000
Use Multiplier & Dilution Factor with ISTDs
    
```

Signal 1: WVD1 A, Wavelength=254 nm

| Peak # | RetTime [min] | Type | Width [min] | Area mAU *s | Height [mAU] | Area %  |
|--------|---------------|------|-------------|-------------|--------------|---------|
| 1      | 12.856        | MM   | 0.7833      | 5317.91553  | 113.15076    | 48.2193 |
| 2      | 18.153        | MM   | 0.8710      | 5710.69531  | 109.27671    | 51.7807 |

Totals : 1.10286e4 222.42747

Data File D:\LC\LTL\DATA\LTL-4-34A\LTL-4-34A 2010-01-22 10-00-51\SIG1000001.D  
 Sample Name: LTL-4-34A

```

=====
Acq. Operator   : LTL                               Seq. Line :    1
Acq. Instrument : Instrument 1                       Location  : Vial 94
Injection Date  : 1/22/2010 10:01:47 AM            Inj       :    1
                                                    Inj Volume: 5 µl
Acq. Method    : D:\LC\LTL\data\LTL-4-34A\LTL-4-34A 2010-01-22 10-00-51\ADH-20-80-10ML-
                254NM-25MIN.M
Last changed   : 1/11/2010 8:51:22 PM by LTL
Analysis Method: D:\LC\LTL\DATA\LTL-4-34A\LTL-4-34A 2010-01-22 10-00-51\SIG1000001.D\DA.M (
                ADH-20-80-10ML-254NM-25MIN.M)
Last changed   : 3/3/2010 4:38:29 PM by dxq
                (modified after loading)
    
```

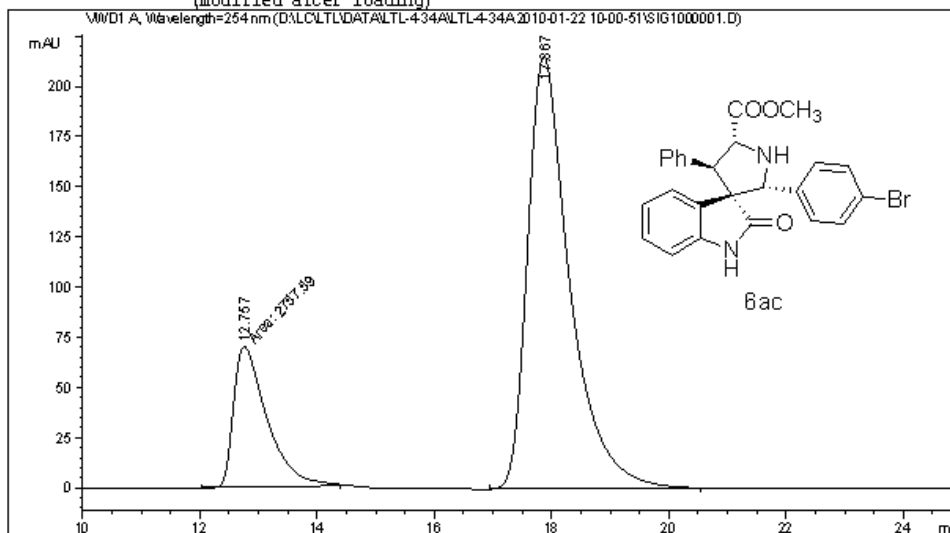

Area Percent Report

```

Sorted By      : Signal
Multiplier     : 1.0000
Dilution       : 1.0000
Use Multiplier & Dilution Factor with ISTDs
    
```

Signal 1: WMD1 A, Wavelength=254 nm

| Peak #   | RetTime [min] | Type | Width [min] | Area mAU *s | Height [mAU] | Area %  |
|----------|---------------|------|-------------|-------------|--------------|---------|
| 1        | 12.757        | MM   | 0.6582      | 2757.58960  | 69.82346     | 20.3527 |
| 2        | 17.867        | EB   | 0.7425      | 1.07914e4   | 215.66219    | 79.6473 |
| Totals : |               |      |             | 1.35490e4   | 285.48565    |         |

Data File D:\LC\LTL\DATA\LTL-4-23\LTL-4-16-25A 2010-01-14 16-42-22\SIG1000004.D  
 Sample Name: LTL-4-23A

```

=====
Acq. Operator   : LTL                      Seq. Line :    4
Acq. Instrument : Instrument 1              Location  : Vial 44
Injection Date  : 1/14/2010 5:46:16 PM     Inj       :    1
                                           Inj Volume: 5 µl
Acq. Method    : D:\LC\LTL\data\LTL-4-23\LTL-4-16-25A 2010-01-14 16-42-22\ADH-20-80-10ML-
                254NM-50MIN.M
Last changed   : 1/11/2010 8:52:24 PM by LTL
Analysis Method: D:\LC\LTL\DATA\LTL-4-23\LTL-4-16-25A 2010-01-14 16-42-22\SIG1000004.D\DA.M
                (ADH-20-80-10ML-254NM-50MIN.M)
Last changed   : 3/3/2010 5:03:28 PM by dxq
                (modified after loading)
    
```

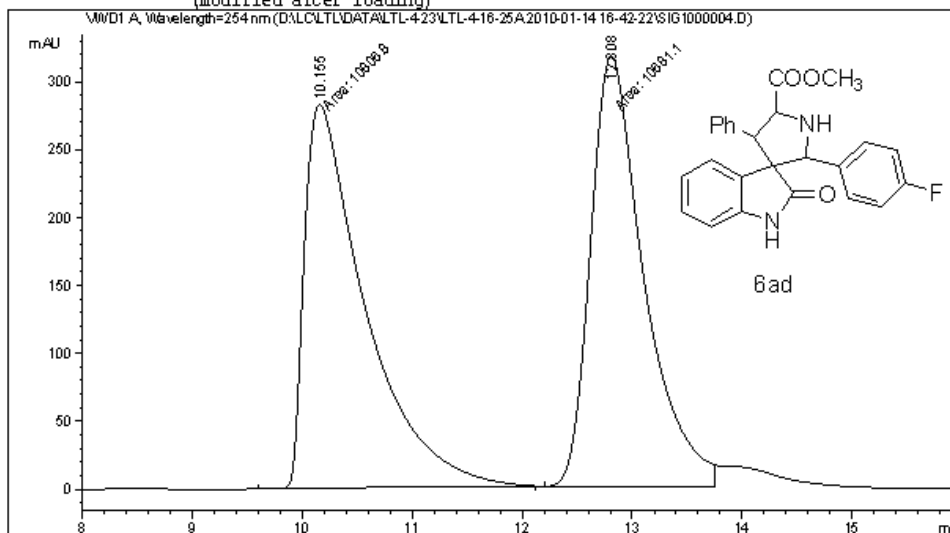

Area Percent Report

```

Sorted By      : Signal
Multiplier     : 1.0000
Dilution       : 1.0000
Use Multiplier & Dilution Factor with ISTDs
    
```

Signal 1: WMD1 A, Wavelength=254 nm

| Peak #   | RetTime [min] | Type | Width [min] | Area mAU *s | Height [mAU] | Area %  |
|----------|---------------|------|-------------|-------------|--------------|---------|
| 1        | 10.155        | MM   | 0.6380      | 1.08068e4   | 282.29733    | 50.2925 |
| 2        | 12.808        | MF   | 0.5620      | 1.06811e4   | 316.76315    | 49.7075 |
| Totals : |               |      |             | 2.14880e4   | 599.06049    |         |

Data File D:\LC\LTL\DATA\LTL-4-90\LTL-4-90-100304 2010-03-04 10-37-21\SIG1000008.D  
 Sample Name: LTL-4-25B

```

=====
Acq. Operator   : LTL                               Seq. Line :    8
Acq. Instrument : Instrument 1                       Location  : Vial 77
Injection Date  : 3/4/2010 1:25:17 PM              Inj       :    1
                                                    Inj Volume: 5 µl
Acq. Method     : D:\LC\LTL\data\LTL-4-90\LTL-4-90-100304 2010-03-04 10-37-21\ADH-20-80-
10ML-254NM-25MIN.M
Last changed    : 1/11/2010 8:51:22 PM by LTL
Analysis Method : D:\LC\LTL\DATA\LTL-4-90\LTL-4-90-100304 2010-03-04 10-37-21\SIG1000008.D\
D\M (ADH-20-80-10ML-254NM-25MIN.M)
Last changed    : 3/4/2010 2:47:38 PM by LTL
(modified after loading)
    
```

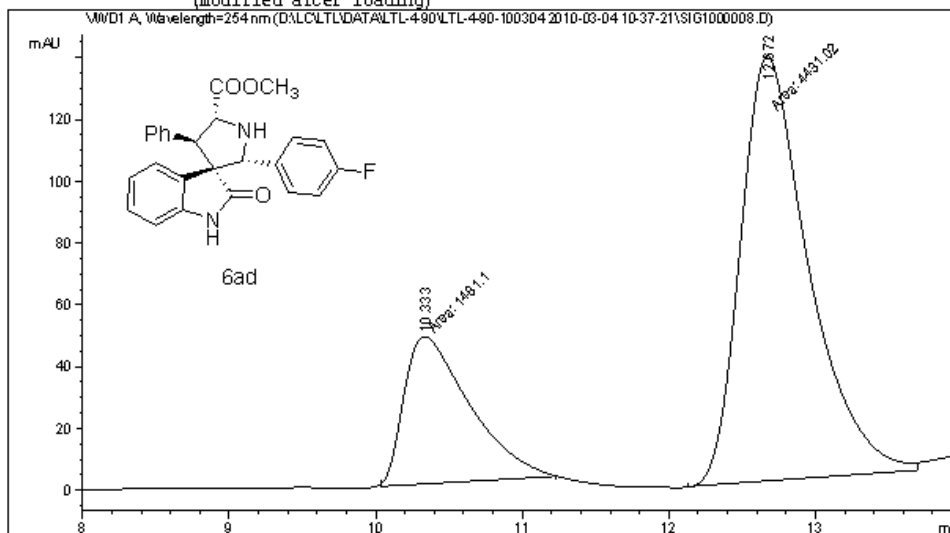

=====  
 Area Percent Report  
 =====

```

Sorted By      :      Signal
Multiplier     :      1.0000
Dilution       :      1.0000
Use Multiplier & Dilution Factor with ISTDs
    
```

Signal 1: WMD1 A, Wavelength=254 nm

| Peak # | RetTime [min] | Type | Width [min] | Area mAU   | Height [mAU] | Area %  |
|--------|---------------|------|-------------|------------|--------------|---------|
| 1      | 10.333        | MM   | 0.5180      | 1481.09888 | 47.65464     | 25.0519 |
| 2      | 12.672        | MM   | 0.5373      | 4431.02197 | 137.44360    | 74.9481 |

Totals :                    5912.12085   185.09824



Data File D:\LC\LTL\DATA\LTL-4-90\LTL-4-90-100304 2010-03-04 10-37-21\SIG1000002.D  
 Sample Name: LTL-4-21A

```

=====
Acq. Operator   : LTL                               Seq. Line :    2
Acq. Instrument : Instrument 1                       Location  : Vial 71
Injection Date  : 3/4/2010 10:49:10 AM              Inj       :    1
                                                    Inj Volume: 5 µl
Acq. Method     : D:\LC\LTL\data\LTL-4-90\LTL-4-90-100304 2010-03-04 10-37-21\ADH-20-80-
                  10ML-254NM-25MIN.M
Last changed    : 1/11/2010 8:51:22 PM by LTL
Analysis Method : D:\LC\LTL\DATA\LTL-4-90\LTL-4-90-100304 2010-03-04 10-37-21\SIG1000002.D\
                  DA.M (ADH-20-80-10ML-254NM-25MIN.M)
Last changed    : 3/4/2010 2:37:07 PM by LTL
                  (modified after loading)
    
```

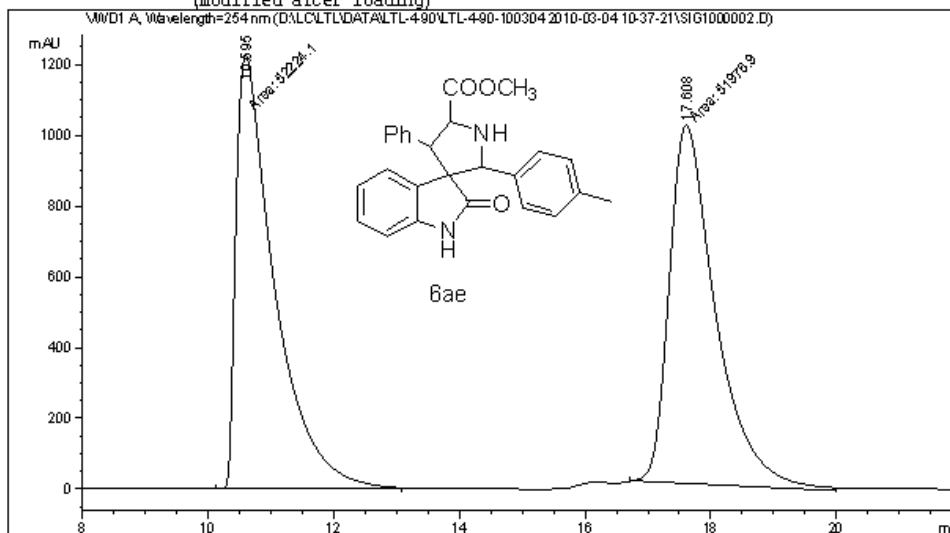

Area Percent Report

```

Sorted By      : Signal
Multiplier     : 1.0000
Dilution       : 1.0000
Use Multiplier & Dilution Factor with ISTDs
    
```

Signal 1: WMD1 A, Wavelength=254 nm

| Peak # | RetTime [min] | Type | Width [min] | Area mAU *s | Height [mAU] | Area %  |
|--------|---------------|------|-------------|-------------|--------------|---------|
| 1      | 10.595        | MM   | 0.7113      | 5.22241e4   | 1223.61377   | 50.1186 |
| 2      | 17.608        | MM   | 0.8547      | 5.19769e4   | 1013.55743   | 49.8814 |

Totals : 1.04201e5 2237.17120

Data File D:\LC\LTL\DATA\LTL-4-90\LTL-4-90-100304 2010-03-04 10-37-21\SIG1000003.D  
 Sample Name: LTL-4-5B

```

=====
Acq. Operator   : LTL                               Seq. Line :    3
Acq. Instrument : Instrument 1                       Location  : Vial 72
Injection Date  : 3/4/2010 11:15:06 AM              Inj       :    1
                                                    Inj Volume: 5 µl
Acq. Method     : D:\LC\LTL\data\LTL-4-90\LTL-4-90-100304 2010-03-04 10-37-21\ADH-20-80-
                10ML-254NM-25MIN.M
Last changed    : 1/11/2010 8:51:22 PM by LTL
Analysis Method : D:\LC\LTL\DATA\LTL-4-90\LTL-4-90-100304 2010-03-04 10-37-21\SIG1000003.D\
                DA.M (ADH-20-80-10ML-254NM-25MIN.M)
Last changed    : 3/4/2010 2:41:25 PM by LTL
                (modified after loading)
    
```

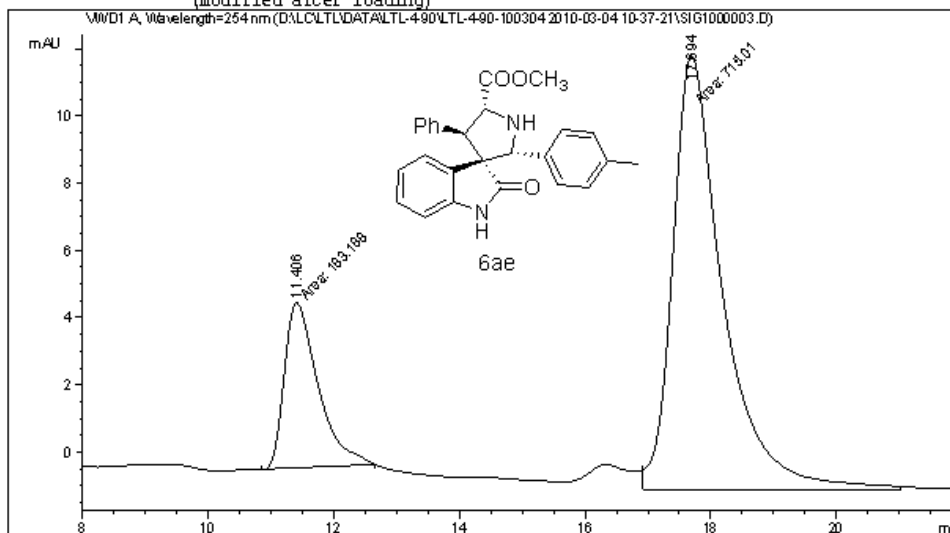

Area Percent Report

```

Sorted By      : Signal
Multiplier     : 1.0000
Dilution       : 1.0000
Use Multiplier & Dilution Factor with ISTDs
    
```

Signal 1: WMD1 A, Wavelength=254 nm

| Peak # | RetTime [min] | Type | Width [min] | Area mAU *s | Height [mAU] | Area %  |
|--------|---------------|------|-------------|-------------|--------------|---------|
| 1      | 11.406        | MM   | 0.6214      | 183.18816   | 4.91349      | 20.3951 |
| 2      | 17.694        | MM   | 0.9239      | 715.01031   | 12.89780     | 79.6049 |

Totals : 898.19847 17.81129

Data File D:\LC\LTL\DATA\LTL-4-29\LTL-4-29 2010-01-18 16-27-14\SIG1000002.D  
Sample Name: LTL-4-29A

```
=====
Acq. Operator   : LTL                               Seq. Line :    2
Acq. Instrument : Instrument 1                       Location  : Vial 64
Injection Date  : 1/18/2010 4:39:07 PM              Inj       :    1
                                                    Inj Volume: 5 µl
Acq. Method     : D:\LC\LTL\data\LTL-4-29\LTL-4-29 2010-01-18 16-27-14\ADH-20-80-10ML-254NM-
25MIN.M
Last changed    : 1/11/2010 8:51:22 PM by LTL
Analysis Method : D:\LC\LTL\DATA\LTL-4-29\LTL-4-29 2010-01-18 16-27-14\SIG1000002.D\DA.M (
ADH-20-80-10ML-254NM-25MIN.M)
Last changed    : 3/3/2010 4:48:19 PM by dxq
(modified after loading)
```

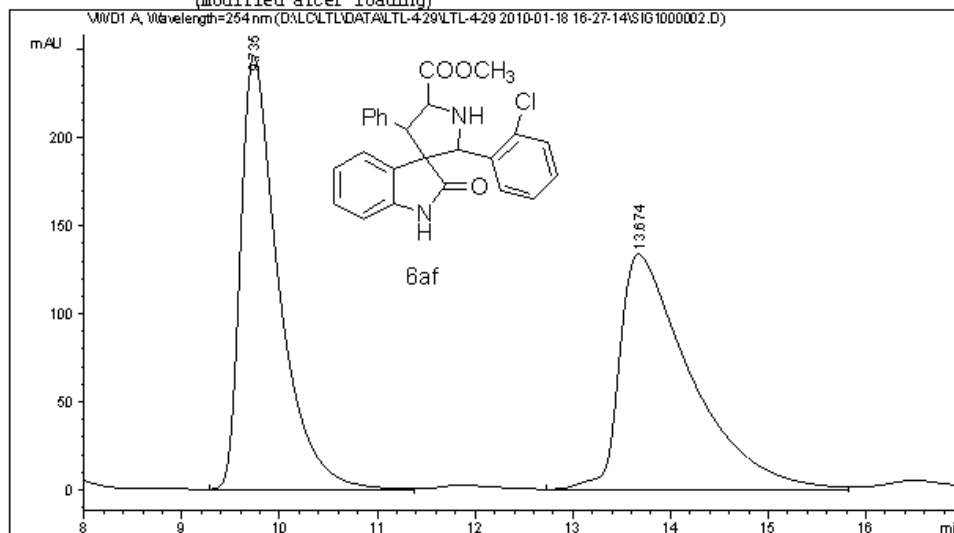

=====  
Area Percent Report  
=====

Sorted By : Signal  
Multiplier : 1.0000  
Dilution : 1.0000  
Use Multiplier & Dilution Factor with ISTDs

Signal 1: VMD1 A, Wavelength=254 nm

| Peak # | RetTime [min] | Type | Width [min] | Area mAU   | Height [mAU] | Area %  |
|--------|---------------|------|-------------|------------|--------------|---------|
| 1      | 9.735         | EB   | 0.4005      | 6665.88379 | 246.09087    | 49.6555 |
| 2      | 13.674        | VB   | 0.7316      | 6758.36670 | 133.56250    | 50.3445 |

Totals : 1.34243e4 379.65337

Data File D:\LC\LTL\DATA\LTL-4-29\LTL-4-29 2010-01-18 16-27-14\SIG1000003.D  
 Sample Name: LTL-4-29B

```

=====
Acq. Operator   : LTL                               Seq. Line :    3
Acq. Instrument : Instrument 1                       Location  : Vial 65
Injection Date  : 1/18/2010 5:05:06 PM              Inj       :    1
                                                    Inj Volume: 5 µl
Acq. Method     : D:\LC\LTL\data\LTL-4-29\LTL-4-29 2010-01-18 16-27-14\ADH-20-80-10ML-254NM-
                25MIN.M
Last changed    : 1/11/2010 8:51:22 PM by LTL
Analysis Method : D:\LC\LTL\DATA\LTL-4-29\LTL-4-29 2010-01-18 16-27-14\SIG1000003.D\DA.M (
                ADH-20-80-10ML-254NM-25MIN.M)
Last changed    : 3/3/2010 4:48:49 PM by dxq
                (modified after loading)
    
```

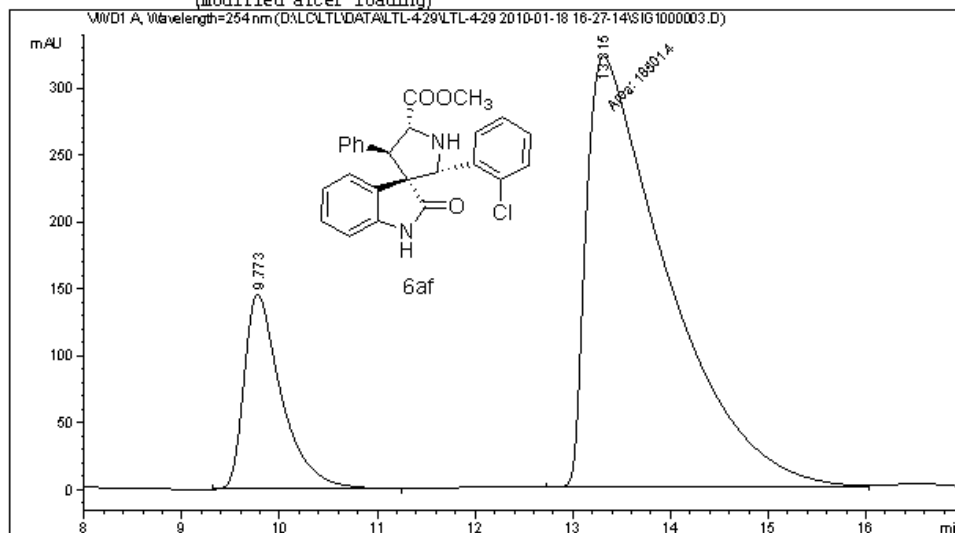

Area Percent Report

```

Sorted By       :      Signal
Multiplier      :      1.0000
Dilution        :      1.0000
Use Multiplier & Dilution Factor with ISTDs
    
```

Signal 1: VMD1 A, Wavelength=254 nm

| Peak #   | RetTime [min] | Type | Width [min] | Area mAU   | Height [mAU] | Area %  |
|----------|---------------|------|-------------|------------|--------------|---------|
| 1        | 9.773         | BB   | 0.3912      | 3874.22656 | 145.97577    | 17.3145 |
| 2        | 13.315        | MM   | 0.9577      | 1.85014e4  | 321.97354    | 82.6855 |
| Totals : |               |      |             | 2.23757e4  | 467.94931    |         |

Data File D:\LC\LTL\DATA\LTL-4-21C-AD\LTL-4-100111-AD 2010-01-11 20-53-29\SIG1000004.D  
Sample Name: LTL-4-21C

=====  
Acq. Operator : LTL Seq. Line : 4  
Acq. Instrument : Instrument 1 Location : Vial 53  
Injection Date : 1/11/2010 10:22:17 PM Inj : 1  
Inj Volume : 5 µl  
Acq. Method : D:\LC\LTL\data\LTL-4-21C-AD\LTL-4-100111-AD 2010-01-11 20-53-29\ADH-20-80-  
10ML-254NM-50MIN.M  
Last changed : 1/11/2010 8:52:24 PM by LTL  
Analysis Method : D:\LC\LTL\DATA\LTL-4-21C-AD\LTL-4-100111-AD 2010-01-11 20-53-29\  
SIG1000004.D\DA.M (ADH-20-80-10ML-254NM-50MIN.M)  
Last changed : 3/3/2010 5:05:53 PM by dxq  
(modified after loading)

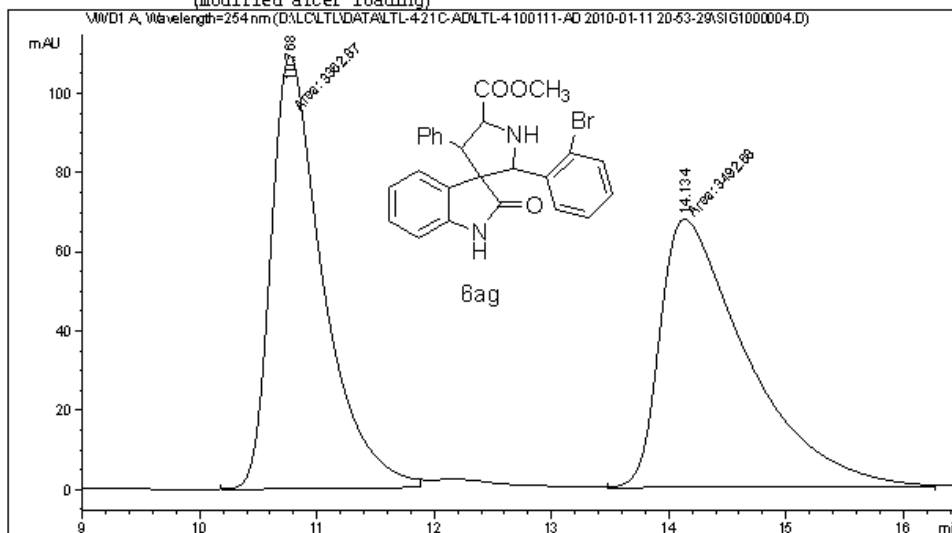

=====  
Area Percent Report  
=====

Sorted By : Signal  
Multiplier : 1.0000  
Dilution : 1.0000  
Use Multiplier & Dilution Factor with ISTDs

Signal 1: WVD1 A, Wavelength=254 nm

| Peak # | RetTime [min] | Type | Width [min] | Area mAU   | Height [mAU] | Area %  |
|--------|---------------|------|-------------|------------|--------------|---------|
| 1      | 10.768        | MM   | 0.5132      | 3362.87061 | 109.21862    | 49.0532 |
| 2      | 14.134        | MM   | 0.8591      | 3492.68457 | 67.75979     | 50.9468 |

Totals : 6855.55518 176.97841

Data File D:\LC\LTL\DATA\LTL-4-21\LTL-4-21-AD-100112 2010-01-12 08-40-28\SIG1000003.D  
 Sample Name: LTL-4-21C

```

=====
Acq. Operator   : LTL                               Seq. Line :    3
Acq. Instrument : Instrument 1                       Location  : Vial 54
Injection Date  : 1/12/2010 9:18:21 AM              Inj       :    1
                                                    Inj Volume: 5 µl
Acq. Method    : D:\LC\LTL\data\LTL-4-21\LTL-4-21-AD-100112 2010-01-12 08-40-28\ADH-20-80-
10ML-254NM-25MIN.M
Last changed   : 1/11/2010 8:51:22 PM by LTL
Analysis Method: D:\LC\LTL\DATA\LTL-4-21\LTL-4-21-AD-100112 2010-01-12 08-40-28\SIG1000003.D
D\DA.M (ADH-20-80-10ML-254NM-25MIN.M)
Last changed   : 3/3/2010 5:09:24 PM by dxq
                (modified after loading)
    
```

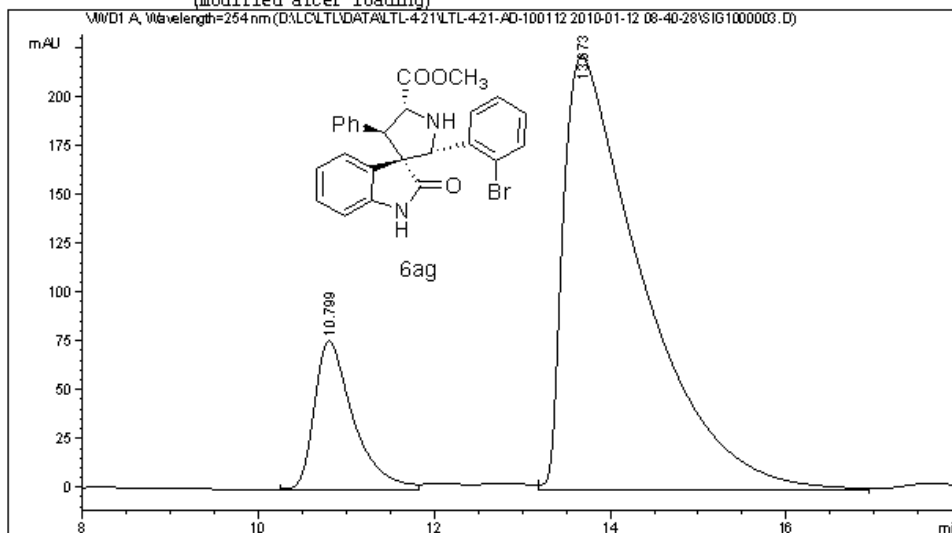

Area Percent Report

```

=====
Sorted By      : Signal
Multiplier     : 1.0000
Dilution       : 1.0000
Use Multiplier & Dilution Factor with ISTDs
    
```

Signal 1: WMD1 A, Wavelength=254 nm

| Peak #   | RetTime [min] | Type | Width [min] | Area mAU *s | Height [mAU] | Area %  |
|----------|---------------|------|-------------|-------------|--------------|---------|
| 1        | 10.799        | BV   | 0.4553      | 2333.16162  | 76.08574     | 14.4409 |
| 2        | 13.673        | VB   | 0.8782      | 1.38235e4   | 221.89778    | 85.5591 |
| Totals : |               |      |             | 1.61566e4   | 297.98352    |         |

Data File D:\LC\LTL\DATA\LTL-4-72\LTL-4-72A 2010-03-23 09-27-21\SIG1000002.D  
 Sample Name: LTL-4-72A

```

=====
Acq. Operator   : LTL                               Seq. Line :    2
Acq. Instrument : Instrument 1                       Location  : Vial 54
Injection Date  : 3/23/2010 9:39:12 AM             Inj       :    1
                                                    Inj Volume: 5 µl
Acq. Method    : D:\LC\LTL\data\LTL-4-72\LTL-4-72A 2010-03-23 09-27-21\ADH-20-80-10ML-
                254NM-50MIN.M
Last changed   : 1/11/2010 8:52:24 PM by LTL
Analysis Method: D:\LC\LTL\DATA\LTL-4-72\LTL-4-72A 2010-03-23 09-27-21\SIG1000002.D\DA.M (
                ADH-20-80-10ML-254NM-50MIN.M)
Last changed   : 3/23/2010 10:20:30 AM by LTL
                (modified after loading)
    
```

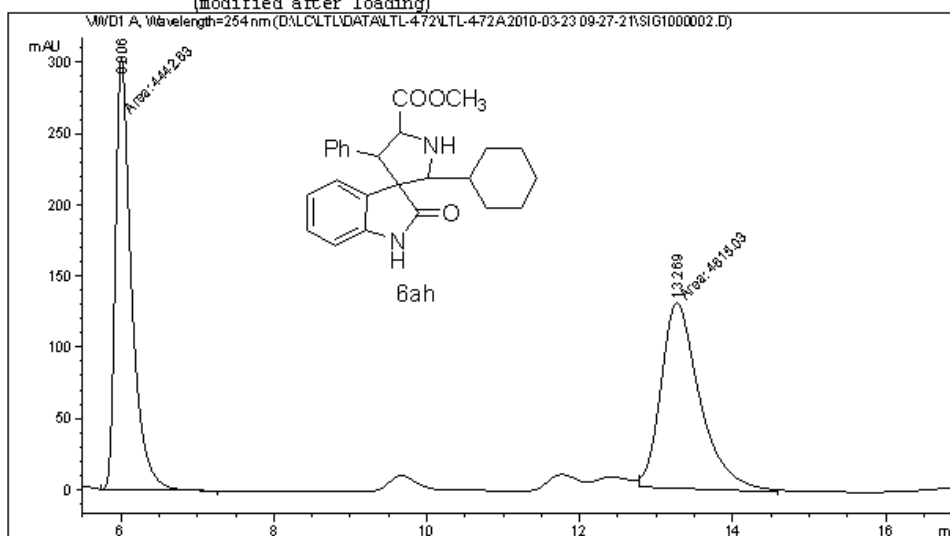

=====  
 Area Percent Report  
 =====

```

Sorted By      :      Signal
Multiplier     :      1.0000
Dilution      :      1.0000
Use Multiplier & Dilution Factor with ISTDs
    
```

Signal 1: WVD1 A, Wavelength=254 nm

| Peak # | RetTime [min] | Type | Width [min] | Area mAU   | Height [mAU] | Area %  |
|--------|---------------|------|-------------|------------|--------------|---------|
| 1      | 6.006         | MM   | 0.2447      | 4442.62744 | 302.64478    | 49.0483 |
| 2      | 13.269        | MM   | 0.5906      | 4615.02783 | 130.22745    | 50.9517 |

Totals :                    9057.65527   432.87222

Instrument 1 3/23/2010 10:20:46 AM LTL

Page 1 of 1

Data File D:\LC\LTL\DATA\LTL-4-72\LTL-4-72B 2010-03-23 10-35-51\SIG1000001.D  
 Sample Name: LTL-4-72B

```

=====
Acq. Operator   : LTL                      Seq. Line :    1
Acq. Instrument : Instrument 1              Location  : Vial 55
Injection Date  : 3/23/2010 10:36:42 AM    Inj       :    1
                                           Inj Volume: 5 µl
Acq. Method     : D:\LC\LTL\data\LTL-4-72\LTL-4-72B 2010-03-23 10-35-51\ADH-20-80-10ML-
254NM-25MIN.M
Last changed    : 1/11/2010 8:51:22 PM by LTL
Analysis Method : D:\LC\LTL\DATA\LTL-4-72\LTL-4-72B 2010-03-23 10-35-51\SIG1000001.D\DA.M (
ADH-20-80-10ML-254NM-25MIN.M)
Last changed    : 3/23/2010 11:02:32 AM by LTL
(modified after loading)
    
```

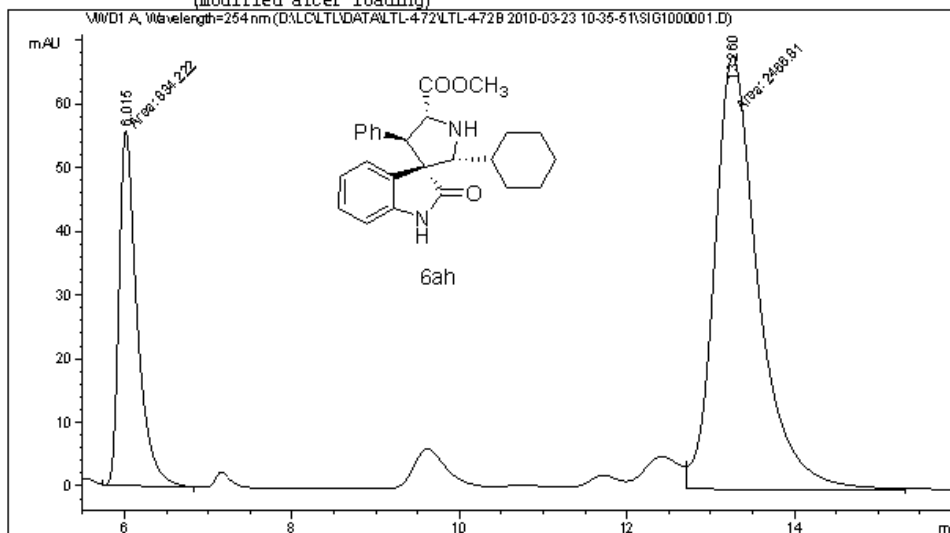

Area Percent Report

```

Sorted By      :      Signal
Multiplier     :      1.0000
Dilution       :      1.0000
Use Multiplier & Dilution Factor with ISTDs
    
```

Signal 1: WVD1 A, Wavelength=254 nm

| Peak # | RetTime [min] | Type | Width [min] | Area mAU   | Height [mAU] | Area %  |
|--------|---------------|------|-------------|------------|--------------|---------|
| 1      | 6.015         | MM   | 0.2495      | 834.22235  | 55.73057     | 25.2715 |
| 2      | 13.260        | MM   | 0.6041      | 2466.81128 | 68.05688     | 74.7285 |

Totals : 3301.03363 123.78745



Data File D:\LC\LTL\DATA\LTL-4-32\LTL-4-32 2010-01-20 15-26-51\SIG1000001.D  
Sample Name: LTL-4-32A

```
=====
Acq. Operator   : LTL                               Seq. Line :    1
Acq. Instrument : Instrument 1                       Location  : Vial 46
Injection Date  : 1/20/2010 3:28:05 PM              Inj       :    1
                                                    Inj Volume: 5 µl
Acq. Method     : D:\LC\LTL\data\LTL-4-32\LTL-4-32 2010-01-20 15-26-51\ADH-20-80-10ML-254NM-
                25MIN.M
Last changed    : 1/11/2010 8:51:22 PM by LTL
Analysis Method : D:\LC\LTL\DATA\LTL-4-32\LTL-4-32 2010-01-20 15-26-51\SIG1000001.D\DA.M (
                ADH-20-80-10ML-254NM-25MIN.M)
Last changed    : 3/3/2010 4:45:05 PM by dxq
                (modified after loading)
=====
```

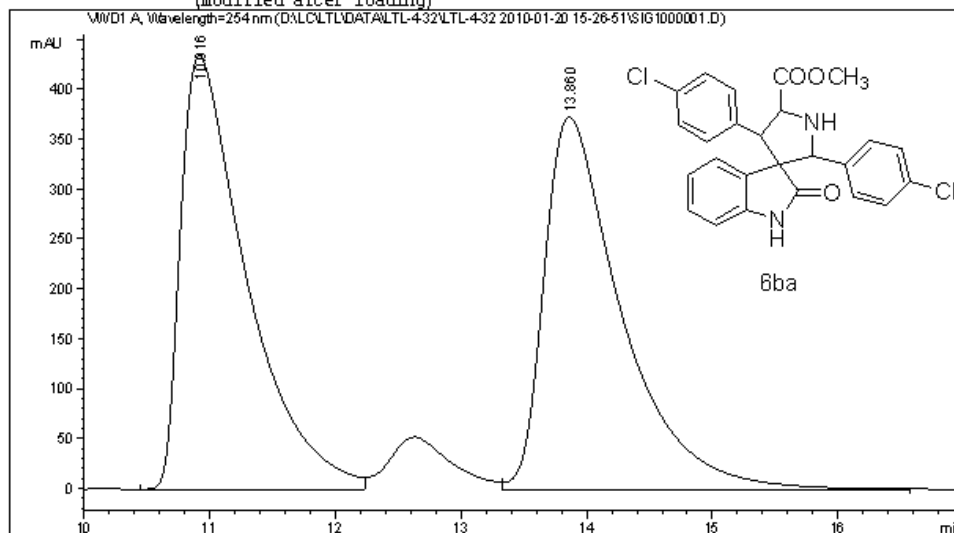

=====  
Area Percent Report  
=====

```
Sorted By      :      Signal
Multiplier     :      1.0000
Dilution       :      1.0000
Use Multiplier & Dilution Factor with ISTDs
```

Signal 1: VMD1 A, Wavelength=254 nm

| Peak # | RetTime [min] | Type | Width [min] | Area mAU  | Height [mAU] | Area %  |
|--------|---------------|------|-------------|-----------|--------------|---------|
| 1      | 10.916        | VV   | 0.5358      | 1.58258e4 | 434.29315    | 49.7897 |
| 2      | 13.860        | VB   | 0.6297      | 1.59595e4 | 373.37299    | 50.2103 |

Totals :                    3.17853e4   807.66614

Data File D:\LC\LTL\DATA\LTL-4-32\LTL-4-32 2010-01-20 15-26-51\SIG1000002.D  
 Sample Name: LTL-4-32E

```

=====
Acq. Operator   : LTL                      Seq. Line :    2
Acq. Instrument : Instrument 1              Location  : Vial 47
Injection Date  : 1/20/2010 3:53:38 PM     Inj       :    1
                                           Inj Volume: 5 µl
Acq. Method     : D:\LC\LTL\data\LTL-4-32\LTL-4-32 2010-01-20 15-26-51\ADH-20-80-10ML-254NM-
25MIN.M
Last changed    : 1/11/2010 8:51:22 PM by LTL
Analysis Method : D:\LC\LTL\DATA\LTL-4-32\LTL-4-32 2010-01-20 15-26-51\SIG1000002.D\DA.M (
ADH-20-80-10ML-254NM-25MIN.M)
Last changed    : 3/3/2010 4:45:44 PM by dxq
(modified after loading)
    
```

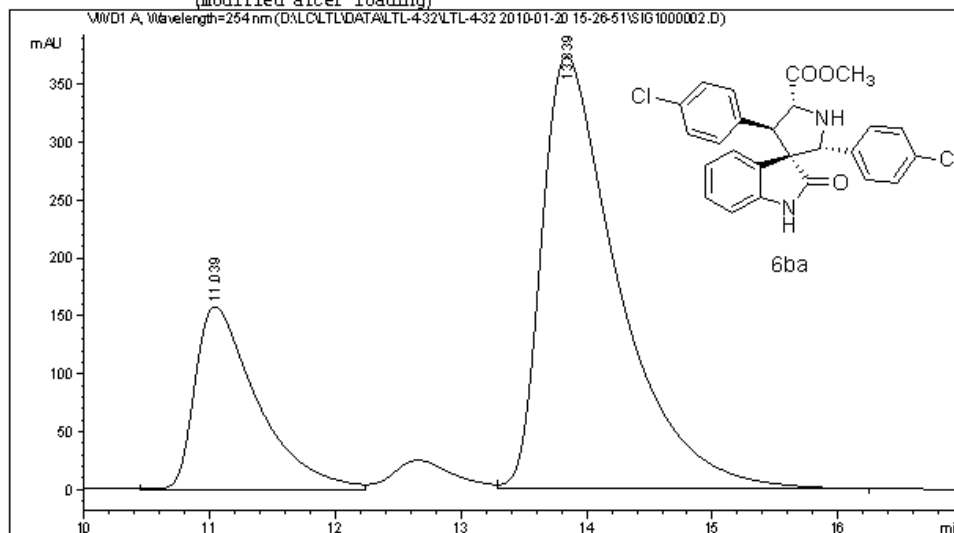

=====  
 Area Percent Report  
 =====

```

Sorted By      :      Signal
Multiplier     :      1.0000
Dilution       :      1.0000
Use Multiplier & Dilution Factor with ISTDs
    
```

Signal 1: VMD1 A, Wavelength=254 nm

| Peak #   | RetTime [min] | Type | Width [min] | Area mAU   | Area *s   | Height [mAU] | Area % |
|----------|---------------|------|-------------|------------|-----------|--------------|--------|
| 1        | 11.039        | VV   | 0.5074      | 5429.81299 | 157.92409 | 25.4595      |        |
| 2        | 13.839        | VB   | 0.6253      | 1.58974e4  | 374.12759 | 74.5405      |        |
| Totals : |               |      |             | 2.13272e4  | 532.05168 |              |        |

Data File D:\LC\LTL\DATA\LTL-4-33\LTL-4-33A 2010-01-21 19-53-56\SIG1000002.D  
 Sample Name: LTL-4-33A

```

=====
Acq. Operator   : LTL                      Seq. Line :    2
Acq. Instrument : Instrument 1              Location  : Vial 92
Injection Date  : 1/21/2010 8:05:41 PM     Inj       :    1
                                           Inj Volume: 5 µl
Acq. Method     : D:\LC\LTL\data\LTL-4-33\LTL-4-33A 2010-01-21 19-53-56\ADH-20-80-10ML-
254NM-50MIN.M
Last changed    : 1/11/2010 8:52:24 PM by LTL
Analysis Method : D:\LC\LTL\DATA\LTL-4-33\LTL-4-33A 2010-01-21 19-53-56\SIG1000002.D\DA.M (
ADH-20-80-10ML-254NM-50MIN.M)
Last changed    : 3/3/2010 4:43:28 PM by dxq
(modified after loading)
    
```

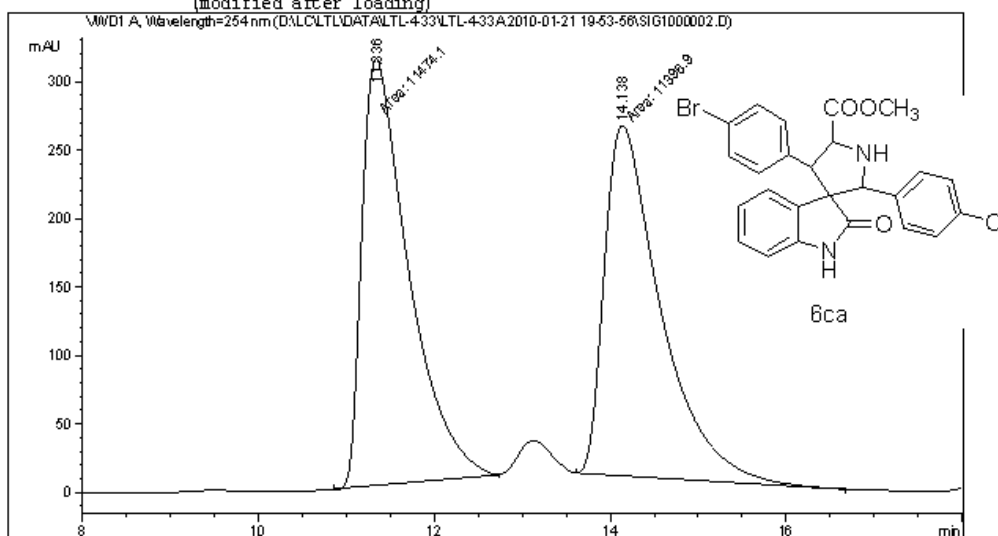

Area Percent Report

```

Sorted By      : Signal
Multiplier     : 1.0000
Dilution       : 1.0000
Use Multiplier & Dilution Factor with ISTDs
    
```

Signal 1: WVD1 A, Wavelength=254 nm

| Peak #   | RetTime [min] | Type | Width [min] | Area mAU *s | Height [mAU] | Area %  |
|----------|---------------|------|-------------|-------------|--------------|---------|
| 1        | 11.336        | MM   | 0.6145      | 1.14741e4   | 311.19073    | 50.1688 |
| 2        | 14.138        | MM   | 0.7426      | 1.13969e4   | 255.78433    | 49.8312 |
| Totals : |               |      |             | 2.28710e4   | 566.97507    |         |

Data File D:\LC\LTL\DATA\LTL-4-33\LTL-4-33B 2010-01-22 08-47-14\SIG1000002.D  
Sample Name: LTL-4-33B

```
=====
Acq. Operator   : LTL                               Seq. Line :    2
Acq. Instrument : Instrument 1                       Location  : Vial 93
Injection Date  : 1/22/2010 8:59:02 AM              Inj       :    1
                                                    Inj Volume: 5 µl
Acq. Method     : D:\LC\LTL\data\LTL-4-33\LTL-4-33B 2010-01-22 08-47-14\ADH-20-80-10ML-
254NM-25MIN.M
Last changed    : 1/11/2010 8:51:22 PM by LTL
Analysis Method : D:\LC\LTL\DATA\LTL-4-33\LTL-4-33B 2010-01-22 08-47-14\SIG1000002.D\DA.M (
ADH-20-80-10ML-254NM-25MIN.M)
Last changed    : 3/3/2010 4:41:55 PM by dxq
(modified after loading)
=====
```

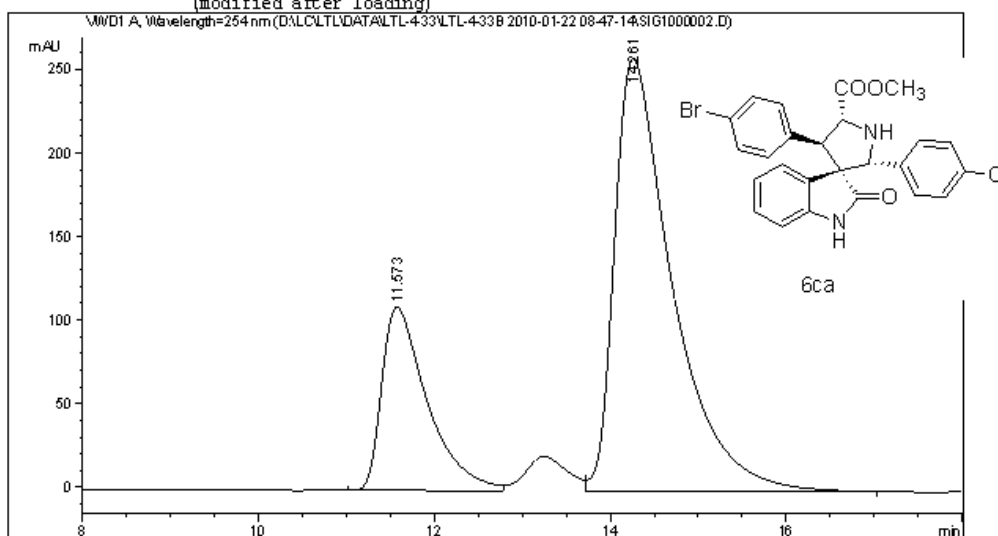

=====  
Area Percent Report  
=====

Sorted By : Signal  
Multiplier : 1.0000  
Dilution : 1.0000  
Use Multiplier & Dilution Factor with ISTDs

Signal 1: WVD1 A, Wavelength=254 nm

| Peak # | RetTime [min] | Type | Width [min] | Area mAU *s | Height [mAU] | Area %  |
|--------|---------------|------|-------------|-------------|--------------|---------|
| 1      | 11.573        | EV   | 0.5335      | 3934.65186  | 109.68585    | 24.9949 |
| 2      | 14.261        | VB   | 0.6774      | 1.18072e4   | 258.32312    | 75.0051 |

Totals : 1.57418e4 368.00897

Instrument 1 3/3/2010 4:42:01 PM dxq

Page 1 of 1

Data File D:\LC\LTL\DATA\LTL-4-37\LTL-4-37-C 2010-01-28 16-22-13\SIG1000002.D  
 Sample Name: LTL-4-37A

```

=====
Acq. Operator   : LTL                               Seq. Line :    2
Acq. Instrument : Instrument 1                       Location  : Vial 61
Injection Date  : 1/28/2010 4:34:16 PM              Inj       :    1
                                                    Inj Volume: 5 µl
Acq. Method     : D:\LC\LTL\data\LTL-4-37\LTL-4-37-C 2010-01-28 16-22-13\ADH-20-80-10ML-
                254NM-25MIN.M
Last changed    : 1/11/2010 8:51:22 PM by LTL
Analysis Method : D:\LC\LTL\DATA\LTL-4-37\LTL-4-37-C 2010-01-28 16-22-13\SIG1000002.D\DA.M (
                ADH-20-80-10ML-254NM-25MIN.M)
Last changed    : 3/3/2010 4:06:39 PM by dxq
                (modified after loading)
    
```

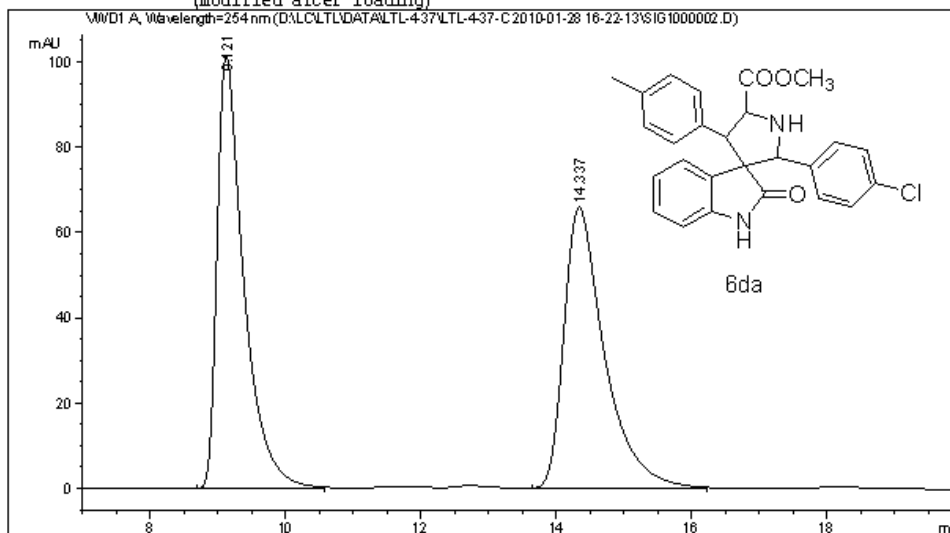

=====  
 Area Percent Report  
 =====

```

Sorted By      :      Signal
Multiplier     :      1.0000
Dilution       :      1.0000
Use Multiplier & Dilution Factor with ISTDs
    
```

Signal 1: WVD1 A, Wavelength=254 nm

| Peak # | RetTime [min] | Type | Width [min] | Area mAU *s | Height [mAU] | Area %  |
|--------|---------------|------|-------------|-------------|--------------|---------|
| 1      | 9.121         | EB   | 0.4029      | 2767.35547  | 101.37668    | 50.2640 |
| 2      | 14.337        | EB   | 0.6163      | 2738.28296  | 65.83073     | 49.7360 |

Totals :                    5505.63843  167.20741

Data File D:\LC\LTL\DATA\LTL-4-37\LTL-4-37-C 2010-01-28 16-22-13\SIG1000004.D  
 Sample Name: LTL-4-37B-1

=====

Acq. Operator : LTL Seq. Line : 4  
 Acq. Instrument : Instrument 1 Location : Vial 63  
 Injection Date : 1/28/2010 5:26:06 PM Inj : 1  
 Inj Volume : 5 µl

Acq. Method : D:\LC\LTL\data\LTL-4-37\LTL-4-37-C 2010-01-28 16-22-13\ADH-20-80-10ML-  
 254NM-25MIN.M

Last changed : 1/11/2010 8:51:22 PM by LTL  
 Analysis Method : D:\LC\LTL\DATA\LTL-4-37\LTL-4-37-C 2010-01-28 16-22-13\SIG1000004.D\DA.M (  
 ADH-20-80-10ML-254NM-25MIN.M)

Last changed : 3/8/2010 7:32:47 PM by zzh  
 (modified after loading)

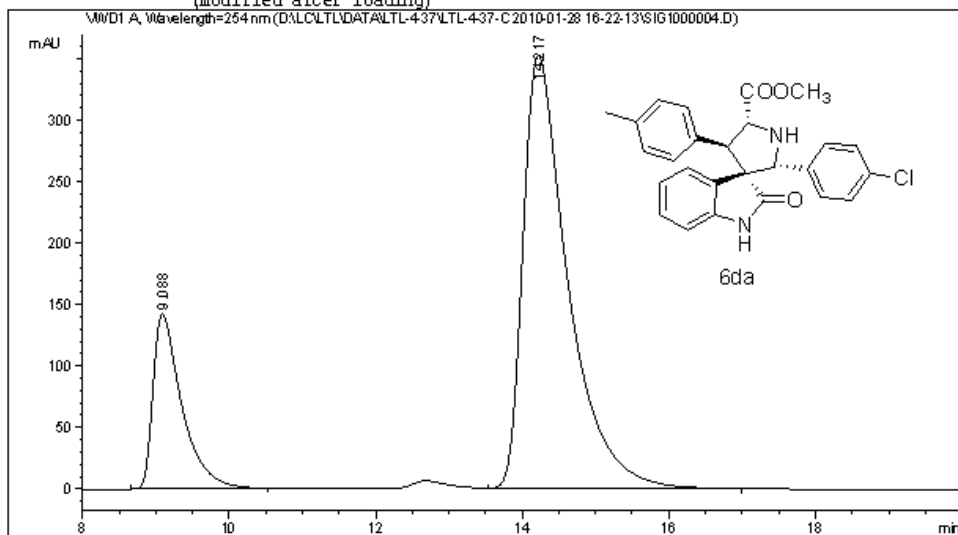

=====  
 Area Percent Report  
 =====

Sorted By : Signal  
 Multiplier : 1.0000  
 Dilution : 1.0000  
 Use Multiplier & Dilution Factor with ISTDs

Signal 1: WVD1 A, Wavelength=254 nm

| Peak #   | RetTime [min] | Type | Width [min] | Area mAU *s | Height [mAU] | Area %  |
|----------|---------------|------|-------------|-------------|--------------|---------|
| 1        | 9.088         | EB   | 0.4053      | 3921.87939  | 142.59384    | 20.6749 |
| 2        | 14.217        | VB   | 0.6327      | 1.50474e4   | 352.00650    | 79.3251 |
| Totals : |               |      |             | 1.89693e4   | 494.60034    |         |

Data File D:\LC\LTL\DATA\LTL-4-90\LTL-4-90-100304 2010-03-04 10-37-21\SIG1000004.D  
 Sample Name: LTL-4-36A

```

=====
Acq. Operator   : LTL                      Seq. Line :    4
Acq. Instrument : Instrument 1              Location  : Vial 73
Injection Date  : 3/4/2010 11:41:05 AM     Inj       :    1
                                           Inj Volume: 5 µl
Acq. Method     : D:\LC\LTL\data\LTL-4-90\LTL-4-90-100304 2010-03-04 10-37-21\ADH-20-80-
                                           10ML-254NM-25MIN.M
Last changed    : 1/11/2010 8:51:22 PM by LTL
Analysis Method : D:\LC\LTL\DATA\LTL-4-90\LTL-4-90-100304 2010-03-04 10-37-21\SIG1000004.D\
                                           DA.M (ADH-20-80-10ML-254NM-25MIN.M)
Last changed    : 3/4/2010 2:42:09 PM by LTL
                                           (modified after loading)
    
```

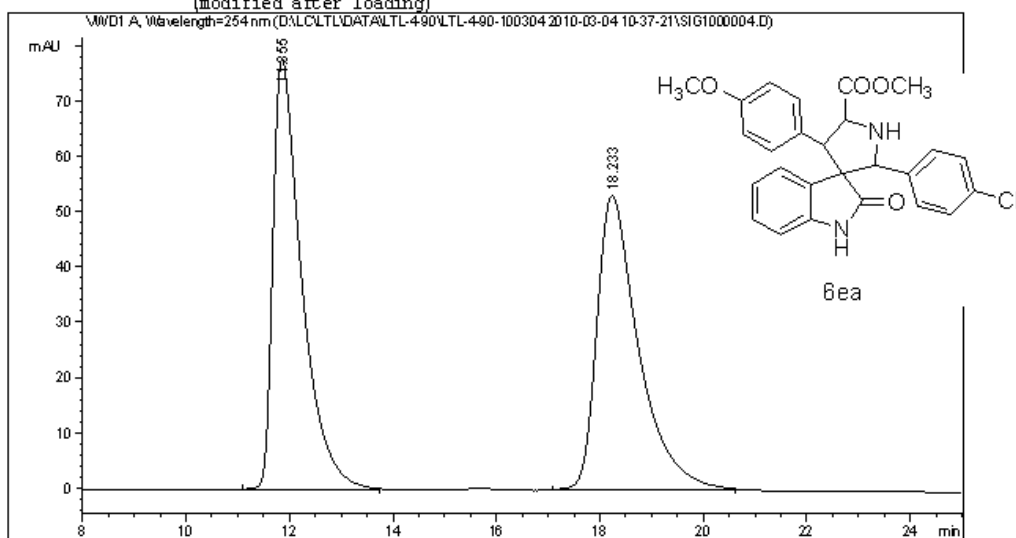

Area Percent Report

```

Sorted By      : Signal
Multiplier     : 1.0000
Dilution       : 1.0000
Use Multiplier & Dilution Factor with ISTDs
    
```

Signal 1: WMD1 A, Wavelength=254 nm

| Peak # | RetTime [min] | Type | Width [min] | Area mAU   | Height [mAU] | Area %  |
|--------|---------------|------|-------------|------------|--------------|---------|
| 1      | 11.855        | EB   | 0.5700      | 3003.93237 | 77.77954     | 50.1799 |
| 2      | 18.233        | EB   | 0.8257      | 2982.39697 | 53.21284     | 49.8201 |

Totals : 5986.32935 130.99238

Data File D:\LC\LTL\DATA\LTL-4-90\LTL-4-90-100304 2010-03-04 10-37-21\SIG1000005.D  
 Sample Name: LTL-4-36B

```

=====
Acq. Operator   : LTL                               Seq. Line :    5
Acq. Instrument : Instrument 1                       Location  : Vial 74
Injection Date  : 3/4/2010 12:07:11 PM             Inj       :    1
                                                    Inj Volume: 5 µl
Acq. Method     : D:\LC\LTL\data\LTL-4-90\LTL-4-90-100304 2010-03-04 10-37-21\ADH-20-80-
10ML-254NM-25MIN.M
Last changed    : 1/11/2010 8:51:22 PM by LTL
Analysis Method : D:\LC\LTL\DATA\LTL-4-90\LTL-4-90-100304 2010-03-04 10-37-21\SIG1000005.D\
D.M (ADH-20-80-10ML-254NM-25MIN.M)
Last changed    : 3/4/2010 2:42:58 PM by LTL
(modified after loading)
    
```

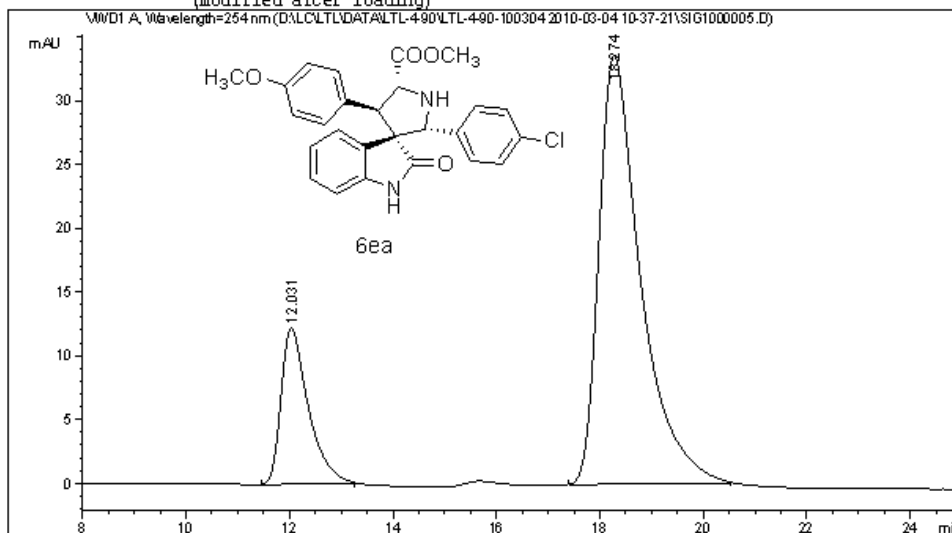

Area Percent Report

```

Sorted By      : Signal
Multiplier     : 1.0000
Dilution       : 1.0000
Use Multiplier & Dilution Factor with ISTDs
    
```

Signal 1: WMD1 A, Wavelength=254 nm

| Peak # | RetTime [min] | Type | Width [min] | Area mAU   | Area %  | Height [mAU] |
|--------|---------------|------|-------------|------------|---------|--------------|
| 1      | 12.031        | BB   | 0.5469      | 449.21252  | 19.2602 | 12.25998     |
| 2      | 18.274        | BB   | 0.8305      | 1883.12451 | 80.7398 | 33.57640     |

Totals : 2332.33704 45.83638



Data File D:\LC\LTL\DATA\LTL-4-40-39A\LTL-4-40-39A 2010-01-26 20-48-58\SIG1000005.D  
Sample Name: LTL-4-39A

```
=====
Acq. Operator   : LTL                               Seq. Line :    5
Acq. Instrument : Instrument 1                       Location  : Vial 23
Injection Date  : 1/26/2010 10:54:01 PM             Inj       :    1
                                                    Inj Volume: 5 µl
Acq. Method     : D:\LC\LTL\data\LTL-4-40-39A\LTL-4-40-39A 2010-01-26 20-48-58\ADH-30-70-
10ML-254NM-50MIN.M
Last changed    : 1/26/2010 8:46:17 PM by LTL
Analysis Method : D:\LC\LTL\DATA\LTL-4-40-39A\LTL-4-40-39A 2010-01-26 20-48-58\SIG1000005.D\
D.M (ADH-30-70-10ML-254NM-50MIN.M)
Last changed    : 3/3/2010 3:55:03 PM by dxq
(modified after loading)
=====
```

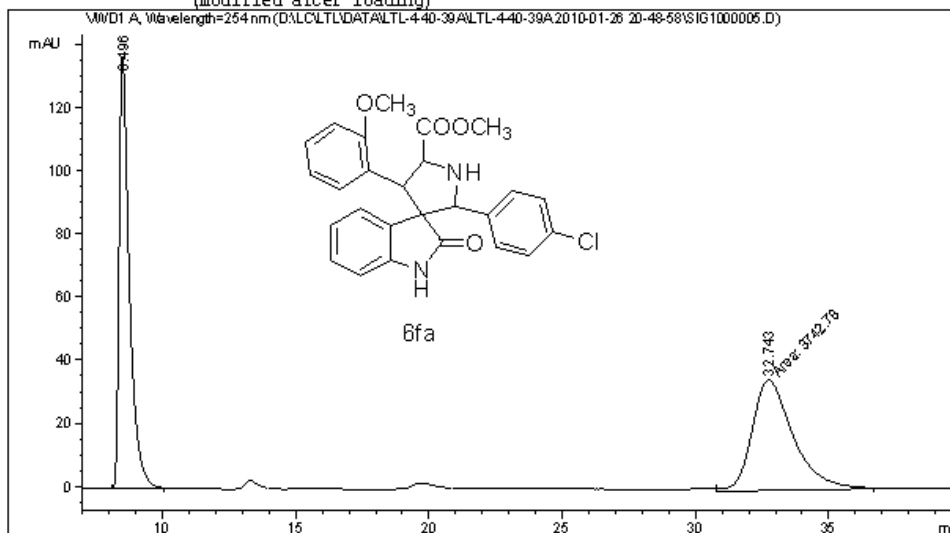

Area Percent Report

```
Sorted By      :      Signal
Multiplier     :      1.0000
Dilution       :      1.0000
Use Multiplier & Dilution Factor with ISTDs
```

Signal 1: WMD1 A, Wavelength=254 nm

| Peak # | RetTime [min] | Type | Width [min] | Area mAU   | Height [mAU] | Area %  |
|--------|---------------|------|-------------|------------|--------------|---------|
| 1      | 8.496         | BE   | 0.3960      | 3675.00342 | 136.96068    | 49.5432 |
| 2      | 32.743        | NM   | 1.7867      | 3742.77710 | 34.91352     | 50.4568 |

Totals : 7417.78052 171.87420

Data File D:\LC\LTL\DATA\LTL-4-39\LTL-4-39 2010-01-27 10-38-40\SIG1000003.D  
 Sample Name: LTL-4-39B

```

=====
Acq. Operator   : LTL                      Seq. Line :    3
Acq. Instrument : Instrument 1              Location  : Vial 26
Injection Date  : 1/27/2010 11:41:31 AM    Inj       :    1
                                           Inj Volume: 5 µl
Acq. Method     : D:\LC\LTL\data\LTL-4-39\LTL-4-39 2010-01-27 10-38-40\ADH-30-70-10ML-254NM-
                    50MIN.M
Last changed    : 1/26/2010 8:46:17 PM by LTL
Analysis Method : D:\LC\LTL\DATA\LTL-4-39\LTL-4-39 2010-01-27 10-38-40\SIG1000003.D\DA.M (
                    ADH-30-70-10ML-254NM-50MIN.M)
Last changed    : 3/4/2010 9:37:56 AM by dxq
                    (modified after loading)
    
```

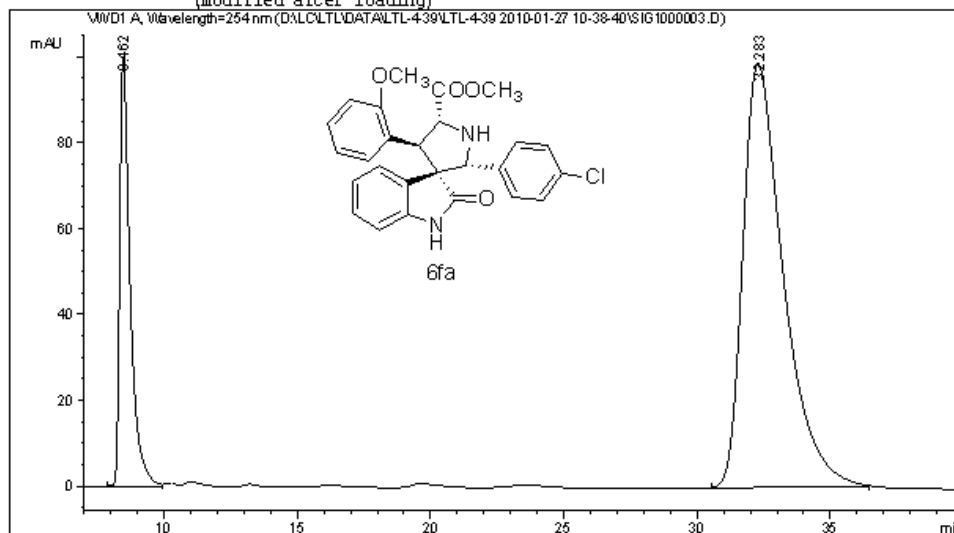

=====  
 Area Percent Report  
 =====

```

Sorted By      :      Signal
Multiplier     :      1.0000
Dilution       :      1.0000
Use Multiplier & Dilution Factor with ISTDs
    
```

Signal 1: VMD1 A, Wavelength=254 nm

| Peak # | RetTime [min] | Type | Width [min] | Area mAU   | Height [mAU] | Area %  |
|--------|---------------|------|-------------|------------|--------------|---------|
| 1      | 8.462         | BB   | 0.3982      | 2721.05420 | 100.24361    | 20.7287 |
| 2      | 32.283        | BB   | 1.5696      | 1.04060e4  | 98.78668     | 79.2713 |

Totals :                    1.31270e4   199.03029

Data File D:\LC\LTL\DATA\LTL-4-49A\LTL-4-49A 2010-03-09 20-39-40\SIG1000002.D  
 Sample Name: LTL-4-49A

```

=====
Acq. Operator   : LTL                               Seq. Line :    2
Acq. Instrument : Instrument 1                       Location  : Vial 11
Injection Date  : 3/9/2010 8:51:30 PM              Inj       :    1
                                                    Inj Volume: 5 µl
Acq. Method     : D:\LC\LTL\data\LTL-4-49A\LTL-4-49A 2010-03-09 20-39-40\ADH-20-80-10ML-
254NM-50MIN.M
Last changed    : 1/11/2010 8:52:24 PM by LTL
Analysis Method : D:\LC\LTL\DATA\LTL-4-49A\LTL-4-49A 2010-03-09 20-39-40\SIG1000002.D\DA.M (
ADH-20-80-10ML-254NM-50MIN.M)
Last changed    : 3/10/2010 8:19:51 AM by LTL
(modified after loading)
    
```

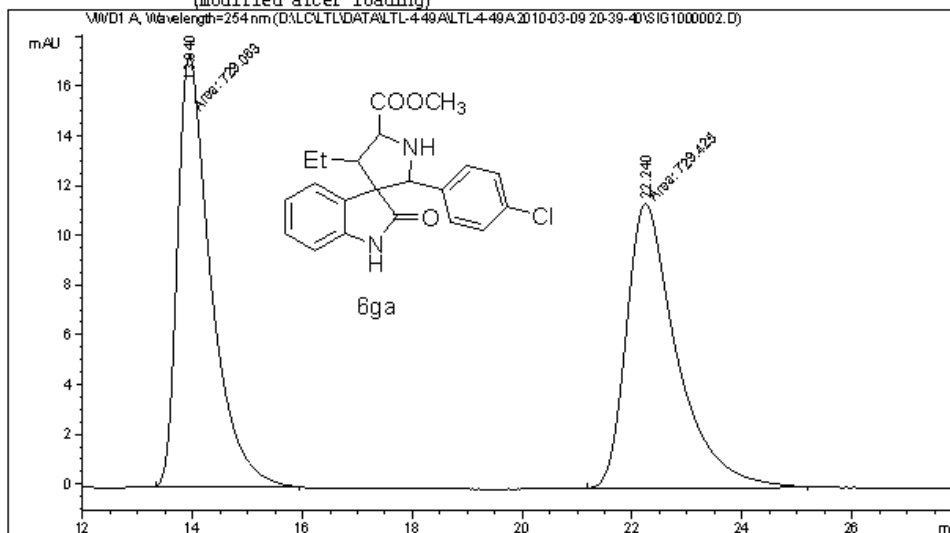

=====  
 Area Percent Report  
 =====

```

Sorted By      :      Signal
Multiplier     :      1.0000
Dilution       :      1.0000
Use Multiplier & Dilution Factor with ISTDs
    
```

Signal 1: WMD1 A, Wavelength=254 nm

| Peak # | RetTime [min] | Type | Width [min] | Area mAU *s | Height [mAU] | Area %  |
|--------|---------------|------|-------------|-------------|--------------|---------|
| 1      | 13.940        | MM   | 0.7025      | 729.06317   | 17.29571     | 49.9876 |
| 2      | 22.240        | MM   | 1.0617      | 729.42480   | 11.45091     | 50.0124 |

Totals :                      1458.48798    28.74662

Data File D:\LC\LTL\DATA\LTL-4-49A\LTL-4-52 2010-03-11 08-37-13\SIG1000002.D  
 Sample Name: LTL-4-52

```

=====
Acq. Operator   : LTL                               Seq. Line :    2
Acq. Instrument : Instrument 1                       Location  : Vial 12
Injection Date  : 3/11/2010 8:49:35 AM             Inj       :    1
                                                    Inj Volume: 5 µl
Acq. Method     : D:\LC\LTL\data\LTL-4-49A\LTL-4-52 2010-03-11 08-37-13\ADH-20-80-10ML-
254NM-30MIN.M
Last changed    : 3/11/2010 8:35:49 AM by LTL
Analysis Method : D:\LC\LTL\DATA\LTL-4-49A\LTL-4-52 2010-03-11 08-37-13\SIG1000002.D\A.M (
ADH-20-80-10ML-254NM-30MIN.M)
Last changed    : 3/11/2010 9:24:30 AM by LTL
(modified after loading)
    
```

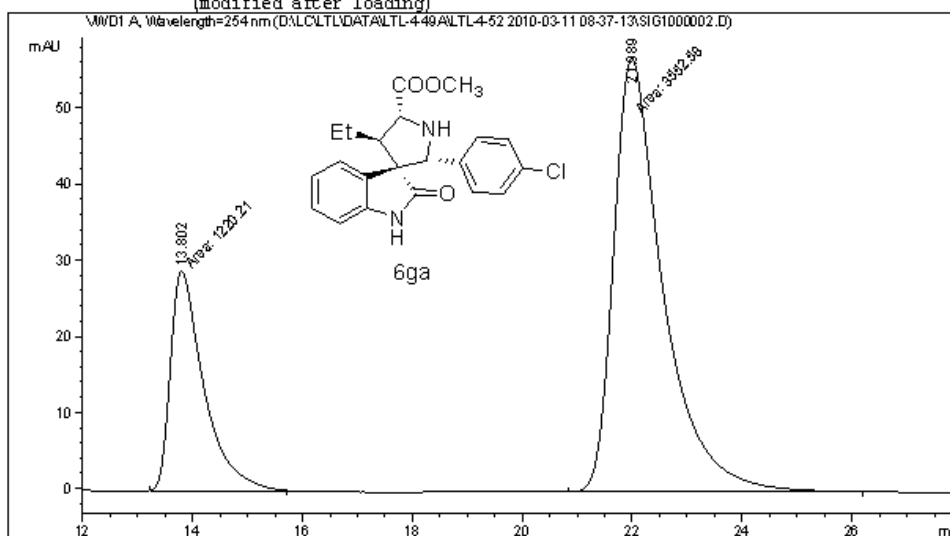

=====  
 Area Percent Report  
 =====

```

Sorted By      :      Signal
Multiplier     :      1.0000
Dilution       :      1.0000
Use Multiplier & Dilution Factor with ISTDs
    
```

Signal 1: WVD1 A, Wavelength=254 nm

| Peak # | RetTime [min] | Type | Width [min] | Area mAU   | Height [mAU] | Area %  |
|--------|---------------|------|-------------|------------|--------------|---------|
| 1      | 13.802        | MM   | 0.7046      | 1220.20959 | 28.86379     | 25.5660 |
| 2      | 21.989        | MM   | 1.0417      | 3552.58154 | 56.84047     | 74.4340 |

Totals :                    4772.79114    85.70426

Data File D:\LC\LTL\DATA\LTL-4-51B\LTL-4-51B 2010-03-11 16-49-31\SIG1000002.D  
 Sample Name: LTL-4-51B

```

=====
Acq. Operator   : LTL                      Seq. Line :    2
Acq. Instrument : Instrument 1              Location  : Vial 13
Injection Date  : 3/11/2010 5:01:19 PM     Inj       :    1
                                           Inj Volume: 5 µl
Acq. Method     : D:\LC\LTL\data\LTL-4-51B\LTL-4-51B 2010-03-11 16-49-31\ADH-20-80-10ML-
254NM.M
Last changed    : 3/11/2010 5:16:22 PM by LTL
                 (modified after loading)
Analysis Method : D:\LC\LTL\DATA\LTL-4-51B\LTL-4-51B 2010-03-11 16-49-31\SIG1000002.D\DA.M (
ADH-20-80-10ML-254NM.M)
Last changed    : 3/11/2010 6:24:44 PM by LTL
                 (modified after loading)
    
```

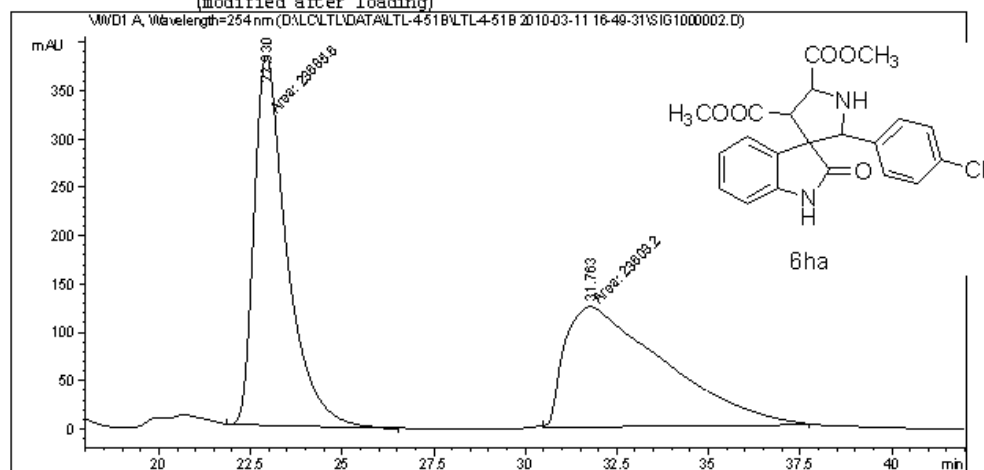

=====  
 Area Percent Report  
 =====

```

Sorted By      :      Signal
Multiplier     :      1.0000
Dilution       :      1.0000
Use Multiplier & Dilution Factor with ISTDs
    
```

Signal 1: VMD1 A, Wavelength=254 nm

| Peak # | RetTime [min] | Type | Width [min] | Area mAU  | Height [mAU] | Area %  |
|--------|---------------|------|-------------|-----------|--------------|---------|
| 1      | 22.930        | MM   | 1.0313      | 2.36856e4 | 382.79385    | 50.0871 |
| 2      | 31.763        | MM   | 3.1485      | 2.36032e4 | 124.94584    | 49.9129 |

Totals :                      4.72887e4    507.73969

=====  
 \*\*\* End of Report \*\*\*

Data File D:\LC\XYZY\DATA\XYZY-7-70\XYZY-7-73 2010-03-12 11-07-34\SIG1000004.D  
 Sample Name: LTL-4-53A

```

=====
Acq. Operator   : TMC                      Seq. Line :    4
Acq. Instrument : Instrument 1              Location  : Vial 31
Injection Date  : 3/12/2010 12:52:02 PM    Inj       :    1
                                           Inj Volume: 5 µl
Acq. Method     : D:\LC\XYZY\DATA\XYZY-7-70\XYZY-7-73 2010-03-12 11-07-34\ADH-20-80-10ML-254NM-
                    50MIN.M
Last changed    : 1/11/2010 8:52:24 PM by LTL
Analysis Method : D:\LC\XYZY\DATA\XYZY-7-70\XYZY-7-73 2010-03-12 11-07-34\SIG1000004.D\DA.M (
                    ADH-20-80-10ML-254NM-50MIN.M)
Last changed    : 4/24/2010 8:52:32 AM by LTL
                    (modified after loading)
    
```

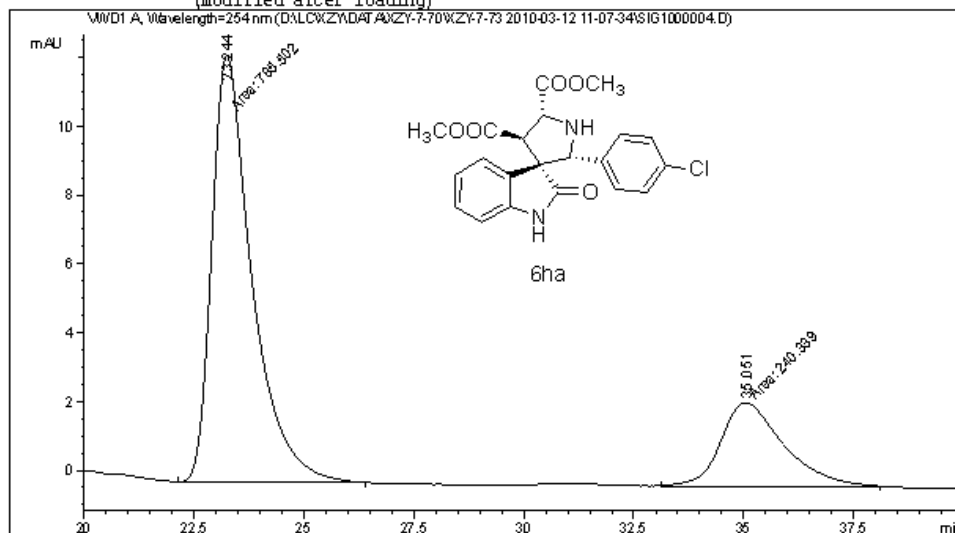

Area Percent Report

```

=====
Sorted By      : Signal
Multiplier     : 1.0000
Dilution       : 1.0000
Use Multiplier & Dilution Factor with ISTDs
    
```

Signal 1: VMD1 A, Wavelength=254 nm

| Peak # | RetTime [min] | Type | Width [min] | Area mAU  | Height [mAU] | Area %  |
|--------|---------------|------|-------------|-----------|--------------|---------|
| 1      | 23.244        | MM   | 1.0578      | 785.50208 | 12.37609     | 76.5715 |
| 2      | 35.051        | MM   | 1.6492      | 240.33896 | 2.42891      | 23.4285 |

Totals :                      1025.84103    14.80500
